# Supplementary material
Source: publisher figshare collection journal article supplement (https://gsajournals.figshare.com/ndownloader/files/25757765)
Supplement: Supplementary file 1 [file 25757765]

## Sheet: CircRNA_BPMmean_ALL
Fbgn	structure	Raw_rep1_Nxt1	Raw_rep2_Nxt1	Raw_rep3_Nxt1	Raw_rep1_WT	Raw_rep2_WT	Raw_rep3_WT	BPM_rep1_Nxt1	BPM_rep2_Nxt1	BPM_rep3_Nxt1	BPM_rep1_WT	BPM_rep2_WT	BPM_rep3_WT	BPM_mean_Nxt1	BPM_mean_WT	FC	log2 FC
FBgn0000008	NM_001014543.5.4	191	136	140	123	83	100	3964.08	1722.68	1962.8	1560.3	1190.98	1083.74	2549.86	1278.34	1.99466	0.996144
FBgn0000008	NM_079902.3.3	9	11	8	0	0	0	186.789	139.335	112.16	0	0	0	146.095	0	Inf	#VALUE!
FBgn0000116	NM_168311.3.3	6	0	13	21	23	5	124.526	0	182.26	266.393	330.03	54.1869	102.262	216.87	0.471537	-1.08456
FBgn0000228	NM_001201770.4.4	60	74	87	87	178	122	1245.26	937.342	1219.74	1103.63	2554.14	1322.16	1134.12	1659.98	0.683211	-0.549597
FBgn0000250	NM_057594.4.3	160	113	118	346	265	259	3320.69	1431.35	1654.36	4389.15	3802.52	2806.88	2135.47	3666.18	0.582477	-0.779726
FBgn0000253	NM_001259347.4.3	2	0	23	26	0	0	41.5087	0	322.461	329.82	0	0	121.323	109.94	1.10354	0.142137
FBgn0000307	NM_078859.2.2	0	6	12	0	0	0	0	76.0007	168.24	0	0	0	81.4137	0	Inf	#VALUE!
FBgn0000370	NM_001273744.3.2	21	10	19	58	7	43	435.841	126.668	266.381	735.753	100.444	466.007	276.297	434.068	0.636528	-0.651704
FBgn0000395	NM_080070.3.2	27	10	63	14	60	96	560.367	126.668	883.262	177.596	860.947	1040.39	523.432	692.977	0.755339	-0.404804
FBgn0000395	NM_080070.5.2	52	15	10	17	71	21	1079.23	190.002	140.2	215.652	1018.79	227.585	469.809	487.341	0.964025	-0.0528576
FBgn0000404	NM_079306.3.2	12	0	0	12	0	6	249.052	0	0	152.225	0	65.0243	83.0173	72.4164	1.14639	0.197097
FBgn0000479	NM_166959.5.3	28	55	53	63	27	19	581.121	696.673	743.062	799.18	387.426	205.91	673.619	464.172	1.45123	0.537273
FBgn0000489	NM_079373.2.2	297	407	420	614	721	652	6164.04	5155.38	5888.41	7788.83	10345.7	7065.97	5735.95	8400.17	0.682837	-0.550388
FBgn0000489	NM_079373.6.3	14	8	49	24	18	8	290.561	101.334	686.982	304.45	258.284	86.6991	359.626	216.478	1.66126	0.732278
FBgn0000490	NM_057963.2.2	0	0	0	17	19	0	0	0	0	215.652	272.633	0	0	162.762	0	#NUM!
FBgn0000547	NM_001273085.5.4	63	33	109	115	109	83	1307.52	418.004	1528.18	1458.82	1564.05	899.503	1084.57	1307.46	0.829525	-0.269642
FBgn0000562	NM_001299850.2.2	0	5	5	73	4	24	0	63.3339	70.1002	926.034	57.3965	260.097	44.478	414.509	0.107303	-3.22024
FBgn0000567	NM_168739.2.2	31	59	44	187	123	102	643.384	747.341	616.882	2372.17	1764.94	1105.41	669.202	1747.51	0.382947	-1.38478
FBgn0000567	NM_168741.3.2	22	38	16	49	28	43	456.595	481.338	224.321	621.584	401.775	466.007	387.418	496.456	0.780368	-0.357774
FBgn0000567	NM_168739.6.6	0	0	0	30	0	22	0	0	0	380.562	0	238.422	0	206.328	0	#NUM!
FBgn0000721	NM_205904.3.3	72	6	1	0	75	3	1494.31	76.0007	14.02	0	1076.18	32.5121	528.111	369.565	1.42901	0.515012
FBgn0000721	NM_058139.4.3	0	0	0	2	0	14	0	0	0	25.3708	0	151.723	0	59.0314	0	#NUM!
FBgn0000723	NM_001275482.7.4	5	24	11	0	19	0	103.772	304.003	154.22	0	272.633	0	187.332	90.8777	2.06136	1.0436
FBgn0001075	NM_058149.2.2	27	0	0	7	0	22	560.367	0	0	88.7978	0	238.422	186.789	109.073	1.71251	0.77611
FBgn0001078	NM_001316437.5.2	0	0	0	30	0	1	0	0	0	380.562	0	10.8374	0	130.466	0	#NUM!
FBgn0001085	NM_080073.4.3	0	0	6	9	13	23	0	0	84.1202	114.169	186.539	249.26	28.0401	183.322	0.152955	-2.70882
FBgn0001316	NM_079149.3.3	25	4	0	15	0	11	518.858	50.6672	0	190.281	0	119.211	189.842	103.164	1.84019	0.879858
FBgn0001316	NM_001043111.5.4	0	36	3	0	3	2	0	456.004	42.0601	0	43.0474	21.6748	166.022	21.574	7.69543	2.944
FBgn0001316	NM_001274282.5.5	0	0	4	14	18	18	0	0	56.0801	177.596	258.284	195.073	18.6934	210.318	0.0888817	-3.49197
FBgn0001316	NM_001274283.4.2	0	0	0	0	1	18	0	0	0	0	14.3491	195.073	0	69.8073	0	#NUM!
FBgn0001994	NM_001299047.2.2	0	1	4	12	6	18	0	12.6668	56.0801	152.225	86.0947	195.073	22.9156	144.464	0.158625	-2.65631
FBgn0002306	NM_001275407.6.5	95	92	125	30	31	34	1971.66	1165.34	1752.5	380.562	444.823	368.471	1629.84	397.952	4.09556	2.03406
FBgn0002306	NM_169177.3.3	21	20	27	30	37	67	435.841	253.336	378.541	380.562	530.917	726.105	355.906	545.861	0.652008	-0.617038
FBgn0002543	NM_001272939.5.4	7	0	0	5	36	5	145.28	0	0	63.427	516.568	54.1869	48.4268	211.394	0.229083	-2.12606
FBgn0002566	NM_001042952.5.2	0	6	15	0	0	0	0	76.0007	210.301	0	0	0	95.4338	0	Inf	#VALUE!
FBgn0002643	NM_080376.3.3	52	0	30	41	48	30	1079.23	0	420.601	520.101	688.758	325.121	499.942	511.327	0.977735	-0.0324843
FBgn0002945	NM_001275101.2.2	9	0	21	18	38	87	186.789	0	294.421	228.337	545.266	942.852	160.403	572.152	0.280351	-1.83469
FBgn0003090	NM_165512.3.3	0	0	0	50	63	77	0	0	0	634.27	903.994	834.478	0	790.914	0	#NUM!
FBgn0003118	NM_079737.3.2	20	21	13	3	7	38	415.087	266.003	182.26	38.0562	100.444	411.821	287.783	183.44	1.56881	0.649673
FBgn0003137	NM_176574.12.11	37	0	34	32	23	17	767.91	0	476.681	405.933	330.03	184.236	414.864	306.733	1.35253	0.435656
FBgn0003149	NM_168290.7.3	4	1	12	13	0	0	83.0173	12.6668	168.24	164.91	0	0	87.9749	54.9701	1.60041	0.678445
FBgn0003165	NM_169258.6.4	136	195	80	69	86	70	2822.59	2470.02	1121.6	875.292	1234.02	758.617	2138.07	955.978	2.23653	1.16126
FBgn0003169	NM_001275645.3.2	0	8	4	0	1	3	0	101.334	56.0801	0	14.3491	32.5121	52.4715	15.6204	3.35916	1.7481
FBgn0003174	NM_001273834.3.3	22	21	8	47	79	51	456.595	266.003	112.16	596.214	1133.58	552.707	278.253	760.833	0.365721	-1.45118
FBgn0003175	NM_001274207.3.3	108	24	117	213	234	330	2241.47	304.003	1640.34	2701.99	3357.69	3576.34	1395.27	3212.01	0.434393	-1.20293
FBgn0003175	NM_001103947.4.3	0	8	9	0	8	0	0	101.334	126.18	0	114.793	0	75.8382	38.2643	1.98196	0.986925
FBgn0003209	NM_001201804.2.2	23	7	0	31	58	51	477.35	88.6675	0	393.247	832.249	552.707	188.672	592.734	0.318309	-1.6515
FBgn0003256	NM_001015121.8.7	61	55	83	52	33	49	1266.01	696.673	1163.66	659.641	473.521	531.032	1042.12	554.731	1.8786	0.909657
FBgn0003256	NM_001015121.8.6	17	0	15	34	0	0	352.824	0	210.301	431.304	0	0	187.708	143.768	1.30563	0.38475
FBgn0003285	NM_001297906.5.4	6	15	6	28	1	12	124.526	190.002	84.1202	355.191	14.3491	130.049	132.883	166.53	0.797952	-0.325626
FBgn0003310	NM_164403.2.2	0	11	21	56	33	74	0	139.335	294.421	710.382	473.521	801.966	144.585	661.956	0.218421	-2.19482
FBgn0003339	NM_001369958.2.2	7	0	0	35	13	10	145.28	0	0	443.989	186.539	108.374	48.4268	246.3	0.196617	-2.34654
FBgn0003366	NM_078559.2.2	6	0	6	0	0	8	124.526	0	84.1202	0	0	86.6991	69.5487	28.8997	2.40656	1.26697
FBgn0003380	NM_001316640.12.12	0	9	14	22	8	17	0	114.001	196.28	279.079	114.793	184.236	103.427	192.702	0.53672	-0.897759
FBgn0003388	NM_001274914.7.3	32	26	2	0	28	0	664.139	329.337	28.0401	0	401.775	0	340.505	133.925	2.5425	1.34625
FBgn0003460	NM_057385.6.2	7	10	5	38	3	25	145.28	126.668	70.1002	482.045	43.0474	270.935	114.016	265.342	0.429695	-1.21862
FBgn0003499	NM_001275764.3.2	2	0	4	0	37	4	41.5087	0	56.0801	0	530.917	43.3495	32.5296	191.422	0.169936	-2.55693
FBgn0003499	NM_169786.2.2	0	0	0	31	9	0	0	0	0	393.247	129.142	0	0	174.13	0	#NUM!
FBgn0003502	NM_001103651.5.3	0	5	0	18	1	10	0	63.3339	0	228.337	14.3491	108.374	21.1113	117.02	0.180408	-2.47067
FBgn0003660	NM_078956.3.2	20	21	0	0	0	0	415.087	266.003	0	0	0	0	227.03	0	Inf	#VALUE!
FBgn0003892	NM_078937.3.3	0	0	9	3	0	11	0	0	126.18	38.0562	0	119.211	42.0601	52.4225	0.80233	-0.317733
FBgn0003975	NM_078999.4.3	0	12	36	14	0	0	0	152.001	504.721	177.596	0	0	218.908	59.1985	3.69786	1.88669
FBgn0003984	NM_001014565.4.2	0	30	24	41	51	47	0	380.004	336.481	520.101	731.805	509.357	238.828	587.088	0.406802	-1.2976
FBgn0004049	NM_001144572.7.6	34	13	2	27	29	24	705.647	164.668	28.0401	342.506	416.124	260.097	299.452	339.576	0.881841	-0.181409
FBgn0004049	NM_001144572.7.2	0	0	0	0	29	18	0	0	0	0	416.124	195.073	0	203.732	0	#NUM!
FBgn0004117	NM_169644.3.2	0	12	0	5	19	17	0	152.001	0	63.427	272.633	184.236	50.6672	173.432	0.292144	-1.77525
FBgn0004197	NM_001300629.4.3	0	1	13	0	0	0	0	12.6668	182.26	0	0	0	64.9757	0	Inf	#VALUE!
FBgn0004197	NM_079803.6.5	1	4	2	26	0	14	20.7543	50.6672	28.0401	329.82	0	151.723	33.1539	160.515	0.206547	-2.27546
FBgn0004198	NM_080025.2.2	0	6	0	0	1	10	0	76.0007	0	0	14.3491	108.374	25.3336	40.9076	0.619287	-0.69132
FBgn0004198	NM_001258636.6.6	0	4	1	5	26	3	0	50.6672	14.02	63.427	373.077	32.5121	21.5624	156.339	0.137921	-2.85809
FBgn0004198	NM_001272381.5.5	0	0	0	15	21	31	0	0	0	190.281	301.331	335.959	0	275.857	0	#NUM!
FBgn0004359	NM_079798.2.2	0	2	0	33	28	13	0	25.3336	0	418.618	401.775	140.886	8.44453	320.426	0.026354	-5.24583
FBgn0004368	NM_167024.4.3	27	9	53	13	0	10	560.367	114.001	743.062	164.91	0	108.374	472.477	91.0947	5.18666	2.3748
FBgn0004373	NM_080083.2.2	88	20	41	44	55	25	1826.38	253.336	574.821	558.157	789.201	270.935	884.846	539.431	1.64033	0.713988
FBgn0004373	NM_001370043.5.3	0	41	7	28	58	34	0	519.338	98.1402	355.191	832.249	368.471	205.826	518.637	0.39686	-1.3333
FBgn0004456	NM_001272576.6.5	5	15	0	18	23	15	103.772	190.002	0	228.337	330.03	162.561	97.9245	240.309	0.407494	-1.29515
FBgn0004606	NM_057502.3.3	0	0	0	9	6	1	0	0	0	114.169	86.0947	10.8374	0	70.3669	0	#NUM!
FBgn0004607	NM_001272130.6.4	0	54	24	66	39	27	0	684.007	336.481	837.236	559.616	292.609	340.162	563.154	0.604031	-0.727305
FBgn0004607	NM_079884.4.4	10	18	0	12	66	0	207.543	228.002	0	152.225	947.042	0	145.182	366.422	0.396215	-1.33565
FBgn0004657	NM_001298068.3.2	1	10	0	2	0	0	20.7543	126.668	0	25.3708	0	0	49.1407	8.45693	5.81071	2.53871
FBgn0004795	NM_176254.5.2	0	0	0	21	25	9	0	0	0	266.393	358.728	97.5364	0	240.886	0	#NUM!
FBgn0004852	NM_079449.2.2	15	16	19	0	13	0	311.315	202.669	266.381	0	186.539	0	260.121	62.1795	4.1834	2.06467
FBgn0004852	NM_079449.6.2	12	24	15	0	0	0	249.052	304.003	210.301	0	0	0	254.452	0	Inf	#VALUE!
FBgn0004852	NM_001259909.11.10	8	18	11	27	65	19	166.035	228.002	154.22	342.506	932.693	205.91	182.752	493.703	0.370167	-1.43375
FBgn0004852	NM_079449.11.9	2	14	0	0	0	0	41.5087	177.335	0	0	0	0	72.9479	0	Inf	#VALUE!
FBgn0004876	NM_079677.2.2	0	38	7	5	25	0	0	481.338	98.1402	63.427	358.728	0	193.159	140.718	1.37267	0.456982
FBgn0004893	NM_164558.3.3	0	18	56	65	36	60	0	228.002	785.122	824.551	516.568	650.243	337.708	663.787	0.508759	-0.974945
FBgn0005536	NM_140573.5.3	132	187	156	124	101	172	2739.57	2368.69	2187.13	1572.99	1449.26	1864.03	2431.8	1628.76	1.49304	0.578248
FBgn0005536	NM_140573.6.3	16	0	0	2	22	18	332.069	0	0	25.3708	315.681	195.073	110.69	178.708	0.619389	-0.691083
FBgn0005536	NM_168648.17.10	0	0	0	0	8	24	0	0	0	0	114.793	260.097	0	124.963	0	#NUM!
FBgn0005626	NM_057549.3.3	0	1	0	38	29	0	0	12.6668	0	482.045	416.124	0	4.22226	299.39	0.0141029	-6.14786
FBgn0005632	NM_170576.2.2	0	8	2	11	0	20	0	101.334	28.0401	139.539	0	216.748	43.1248	118.762	0.363118	-1.46149
FBgn0005649	NM_170118.2.2	8	53	45	46	32	0	166.035	671.34	630.902	583.528	459.172	0	489.425	347.567	1.40815	0.493799
FBgn0005649	NM_170117.2.2	0	1	14	0	16	0	0	12.6668	196.28	0	229.586	0	69.6491	76.5286	0.910105	-0.135895
FBgn0005666	NM_001272143.16.12	12	21	43	0	0	0	249.052	266.003	602.861	0	0	0	372.639	0	Inf	#VALUE!
FBgn0005666	NM_001297787.8.6	18	21	19	17	0	0	373.578	266.003	266.381	215.652	0	0	301.987	71.8839	4.20104	2.07075
FBgn0005666	NM_205876.5.4	10	0	1	0	0	9	207.543	0	14.02	0	0	97.5364	73.8545	32.5121	2.2716	1.18371
FBgn0005666	NM_001272143.21.17	0	0	0	3	8	19	0	0	0	38.0562	114.793	205.91	0	119.586	0	#NUM!
FBgn0005666	NM_001297787.12.9	0	0	0	10	4	0	0	0	0	126.854	57.3965	0	0	61.4168	0	#NUM!
FBgn0005677	NM_165160.7.4	22	0	0	25	34	12	456.595	0	0	317.135	487.87	130.049	152.198	311.684	0.488309	-1.03413
FBgn0010015	NM_079861.9.2	20	0	0	28	0	18	415.087	0	0	355.191	0	195.073	138.362	183.421	0.754341	-0.406711
FBgn0010223	NM_079394.3.2	0	0	0	1	0	13	0	0	0	12.6854	0	140.886	0	51.1905	0	#NUM!
FBgn0010247	NM_001110982.5.5	100	65	29	55	123	107	2075.43	823.341	406.581	697.697	1764.94	1159.6	1101.79	1207.41	0.912518	-0.132076
FBgn0010247	NM_001110982.3.2	32	13	7	14	0	13	664.139	164.668	98.1402	177.596	0	140.886	308.982	106.161	2.91052	1.54128
FBgn0010247	NM_001110982.4.4	1	41	12	3	1	6	20.7543	519.338	168.24	38.0562	14.3491	65.0243	236.111	39.1432	6.03198	2.59263
FBgn0010303	NM_078587.5.2	80	50	62	58	67	123	1660.35	633.339	869.242	735.753	961.391	1333	1054.31	1010.05	1.04382	0.0618756
FBgn0010303	NM_001272571.8.6	5	16	25	16	43	8	103.772	202.669	350.501	202.966	617.012	86.6991	218.98	302.226	0.724559	-0.464825
FBgn0010328	NM_001276081.5.5	21	12	0	0	0	0	435.841	152.001	0	0	0	0	195.948	0	Inf	#VALUE!
FBgn0010382	NM_165124.4.3	0	0	0	19	26	0	0	0	0	241.023	373.077	0	0	204.7	0	#NUM!
FBgn0010383	NM_078679.4.2	2	10	11	69	37	52	41.5087	126.668	154.22	875.292	530.917	563.544	107.466	656.585	0.163674	-2.61111
FBgn0010434	NM_166336.11.8	0	0	0	20	62	51	0	0	0	253.708	889.645	552.707	0	565.353	0	#NUM!
FBgn0010482	NM_001043010.8.4	32	51	22	66	76	110	664.139	646.006	308.441	837.236	1090.53	1192.11	539.529	1039.96	0.518797	-0.946757
FBgn0010482	NM_001169595.12.9	2	0	1	0	8	23	41.5087	0	14.02	0	114.793	249.26	18.5096	121.351	0.152529	-2.71284
FBgn0010762	NM_168421.4.3	0	2	7	19	0	3	0	25.3336	98.1402	241.023	0	32.5121	41.1579	91.1782	0.451401	-1.14752
FBgn0010825	NM_001259742.2.2	0	0	0	92	103	37	0	0	0	1167.06	1477.96	400.983	0	1015.33	0	#NUM!
FBgn0011206	NM_168319.4.3	146	88	141	47	161	112	3030.13	1114.68	1976.82	596.214	2310.21	1213.79	2040.55	1373.4	1.48576	0.5712
FBgn0011206	NM_001169923.5.3	48	25	15	14	20	39	996.208	316.67	210.301	177.596	286.982	422.658	507.726	295.745	1.71677	0.779695
FBgn0011206	NM_168319.4.2	1	15	0	0	34	7	20.7543	190.002	0	0	487.87	75.8617	70.2521	187.911	0.373859	-1.41943
FBgn0011224	NM_176597.3.3	0	0	10	0	15	20	0	0	140.2	0	215.237	216.748	46.7334	143.995	0.32455	-1.62349
FBgn0011589	NM_057661.6.3	29	1	1	0	0	0	601.876	12.6668	14.02	0	0	0	209.521	0	Inf	#VALUE!
FBgn0011589	NM_057661.6.4	6	18	6	11	53	5	124.526	228.002	84.1202	139.539	760.503	54.1869	145.549	318.076	0.457593	-1.12786
FBgn0011591	NM_079467.2.2	13	0	10	2	0	10	269.806	0	140.2	25.3708	0	108.374	136.669	44.5815	3.06559	1.61617
FBgn0011656	NM_001273912.10.7	0	23	0	16	5	0	0	291.336	0	202.966	71.7456	0	97.1121	91.5706	1.06052	0.0847652
FBgn0011656	NM_001273912.3.2	0	7	10	5	0	13	0	88.6675	140.2	63.427	0	140.886	76.2893	68.1043	1.12018	0.163734
FBgn0011666	NM_001276031.5.4	0	0	0	1	16	0	0	0	0	12.6854	229.586	0	0	80.7571	0	#NUM!
FBgn0011739	NM_170524.2.2	7	0	0	10	2	1	145.28	0	0	126.854	28.6982	10.8374	48.4268	55.4632	0.873134	-0.195725
FBgn0011754	NM_078574.9.3	9	14	28	26	5	39	186.789	177.335	392.561	329.82	71.7456	422.658	252.228	274.741	0.918058	-0.123343
FBgn0011754	NM_001298205.9.3	0	1	0	24	0	14	0	12.6668	0	304.45	0	151.723	4.22226	152.058	0.0277675	-5.17046
FBgn0011828	NM_206254.9.7	0	2	0	25	31	0	0	25.3336	0	317.135	444.823	0	8.44453	253.986	0.033248	-4.91059
FBgn0013576	NM_001259999.4.3	36	22	77	55	12	88	747.156	278.669	1079.54	697.697	172.189	953.69	701.789	607.859	1.15453	0.207302
FBgn0013718	NM_001038920.4.2	68	41	82	78	92	95	1411.29	519.338	1149.64	989.461	1320.12	1029.55	1026.76	1113.04	0.922478	-0.116413
FBgn0013718	NM_001259821.5.2	37	0	0	39	0	13	767.91	0	0	494.73	0	140.886	255.97	211.872	1.20813	0.272782
FBgn0013759	NM_001275882.8.2	0	0	0	10	0	3	0	0	0	126.854	0	32.5121	0	53.122	0	#NUM!
FBgn0013987	NM_001201618.3.2	19	0	42	72	25	136	394.332	0	588.841	913.349	358.728	1473.88	327.725	915.32	0.358044	-1.48179
FBgn0014073	NM_079204.2.2	8	15	3	4	20	16	166.035	190.002	42.0601	50.7416	286.982	173.398	132.699	170.374	0.778868	-0.360549
FBgn0014135	NM_001300482.2.2	12	5	15	6	4	13	249.052	63.3339	210.301	76.1124	57.3965	140.886	174.229	91.4649	1.90487	0.929693
FBgn0014141	NM_001202309.4.2	2	0	31	0	1	2	41.5087	0	434.621	0	14.3491	21.6748	158.71	12.008	13.2171	3.72433
FBgn0014343	NM_168505.2.2	0	13	0	9	24	0	0	164.668	0	114.169	344.379	0	54.8894	152.849	0.359109	-1.47751
FBgn0014859	NM_057771.2.2	3	0	19	9	0	0	62.263	0	266.381	114.169	0	0	109.548	38.0562	2.87858	1.52536
FBgn0015513	NM_001260338.8.3	0	27	0	2	0	26	0	342.003	0	25.3708	0	281.772	114.001	102.381	1.1135	0.155101
FBgn0015803	NM_165327.7.6	107	208	134	130	197	182	2220.71	2634.69	1878.68	1649.1	2826.78	1972.4	2244.7	2149.43	1.04432	0.0625685
FBgn0015904	NM_079321.2.2	0	2	0	4	2	15	0	25.3336	0	50.7416	28.6982	162.561	8.44453	80.6669	0.104684	-3.25589
FBgn0015919	NM_079322.4.4	0	0	0	12	3	0	0	0	0	152.225	43.0474	0	0	65.0907	0	#NUM!
FBgn0016078	NM_165674.4.3	0	38	9	63	24	26	0	481.338	126.18	799.18	344.379	281.772	202.506	475.11	0.42623	-1.2303
FBgn0016126	NM_166759.6.4	17	0	5	26	24	1	352.824	0	70.1002	329.82	344.379	10.8374	140.975	228.346	0.617374	-0.695783
FBgn0016930	NM_001273526.8.5	14	2	0	4	0	0	290.561	25.3336	0	50.7416	0	0	105.298	16.9139	6.22555	2.6382
FBgn0016930	NM_001038817.6.5	4	0	0	14	19	13	83.0173	0	0	177.596	272.633	140.886	27.6724	197.038	0.140442	-2.83195
FBgn0016930	NM_205989.8.5	0	0	0	0	40	9	0	0	0	0	573.965	97.5364	0	223.834	0	#NUM!
FBgn0020251	NM_001169883.2.2	45	4	16	8	0	22	933.945	50.6672	224.321	101.483	0	238.422	402.978	113.302	3.55667	1.83053
FBgn0020269	NM_001299498.3.2	9	0	2	29	47	18	186.789	0	28.0401	367.877	674.408	195.073	71.6097	412.453	0.173619	-2.526
FBgn0020278	NM_170032.2.2	41	25	6	11	1	29	850.928	316.67	84.1202	139.539	14.3491	314.284	417.239	156.058	2.67362	1.4188
FBgn0020299	NM_001104322.5.2	0	15	10	0	0	0	0	190.002	140.2	0	0	0	110.067	0	Inf	#VALUE!
FBgn0020299	NM_169588.4.2	2	0	10	12	6	29	41.5087	0	140.2	152.225	86.0947	314.284	60.5697	184.201	0.328823	-1.60461
FBgn0020307	NM_057894.2.2	0	0	0	18	9	0	0	0	0	228.337	129.142	0	0	119.16	0	#NUM!
FBgn0020379	NM_001260092.3.2	0	0	4	0	2	15	0	0	56.0801	0	28.6982	162.561	18.6934	63.753	0.293216	-1.76997
FBgn0020386	NM_167791.3.2	56	116	104	160	114	175	1162.24	1469.35	1458.08	2029.66	1635.8	1896.54	1363.22	1854	0.735288	-0.443619
FBgn0020412	NM_001274768.2.2	0	0	0	4	1	7	0	0	0	50.7416	14.3491	75.8617	0	46.9841	0	#NUM!
FBgn0020445	NM_205900.2.2	0	0	0	16	4	0	0	0	0	202.966	57.3965	0	0	86.7876	0	#NUM!
FBgn0020493	NM_057912.3.3	25	32	30	109	49	74	518.858	405.337	420.601	1382.71	703.107	801.966	448.266	962.594	0.465685	-1.10257
FBgn0020521	NM_001169824.3.2	52	21	0	31	7	30	1079.23	266.003	0	393.247	100.444	325.121	448.409	272.938	1.6429	0.716246
FBgn0020521	NM_166677.6.5	30	22	14	23	68	18	622.63	278.669	196.28	291.764	975.74	195.073	365.86	487.526	0.750443	-0.414186
FBgn0020620	NM_144124.5.2	0	0	0	22	24	8	0	0	0	279.079	344.379	86.6991	0	236.719	0	#NUM!
FBgn0020622	NM_057922.2.2	9	0	5	0	0	4	186.789	0	70.1002	0	0	43.3495	85.6297	14.4498	5.926	2.56706
FBgn0020647	NM_001170238.3.2	0	39	37	22	28	27	0	494.005	518.741	279.079	401.775	292.609	337.582	324.488	1.04035	0.0570739
FBgn0020762	NM_078747.2.2	71	25	50	287	114	178	1473.56	316.67	701.002	3640.71	1635.8	1929.05	830.41	2401.85	0.345737	-1.53225
FBgn0020767	NM_001274050.4.3	0	1	9	9	8	0	0	12.6668	126.18	114.169	114.793	0	46.2824	76.3205	0.606421	-0.721608
FBgn0020910	NM_079592.3.2	10	18	4	4	11	33	207.543	228.002	56.0801	50.7416	157.84	357.634	163.875	188.739	0.868266	-0.203791
FBgn0020912	NM_170531.2.2	39	11	25	10	0	0	809.419	139.335	350.501	126.854	0	0	433.085	42.2847	10.2421	3.35644
FBgn0022382	NM_078947.4.2	19	11	20	0	52	0	394.332	139.335	280.401	0	746.154	0	271.356	248.718	1.09102	0.125675
FBgn0022800	NM_143092.4.3	15	1	0	11	0	4	311.315	12.6668	0	139.539	0	43.3495	107.994	60.963	1.77147	0.824945
FBgn0023172	NM_001259452.8.8	67	52	75	213	204	208	1390.54	658.673	1051.5	2701.99	2927.22	2254.18	1033.57	2627.8	0.393323	-1.34621
FBgn0024183	NM_078848.3.2	0	7	0	6	0	6	0	88.6675	0	76.1124	0	65.0243	29.5558	47.0456	0.628239	-0.670615
FBgn0024277	NM_167847.10.9	59	89	59	25	36	32	1224.51	1127.34	827.182	317.135	516.568	346.796	1059.68	393.5	2.69296	1.42919
FBgn0024321	NM_001260174.4.4	23	10	6	52	39	37	477.35	126.668	84.1202	659.641	559.616	400.983	229.379	540.08	0.424714	-1.23544
FBgn0024321	NM_142100.3.2	8	0	25	43	71	34	166.035	0	350.501	545.472	1018.79	368.471	172.179	644.243	0.267257	-1.9037
FBgn0024804	NM_001015151.4.3	135	58	102	337	205	270	2801.84	734.674	1430.04	4274.98	2941.57	2926.09	1655.52	3380.88	0.489671	-1.03012
FBgn0024804	NM_001276240.5.4	89	90	73	271	246	212	1847.14	1140.01	1023.46	3437.74	3529.88	2297.53	1336.87	3088.38	0.43287	-1.20799
FBgn0024804	NM_001276241.11.10	0	0	0	3	0	10	0	0	0	38.0562	0	108.374	0	48.81	0	#NUM!
FBgn0025360	NM_079956.3.2	0	0	0	15	0	1	0	0	0	190.281	0	10.8374	0	67.0394	0	#NUM!
FBgn0025391	NM_080300.3.2	0	7	0	44	6	4	0	88.6675	0	558.157	86.0947	43.3495	29.5558	229.201	0.128952	-2.9551
FBgn0025525	NM_001274313.2.2	15	33	13	52	46	17	311.315	418.004	182.26	659.641	660.059	184.236	303.86	501.312	0.606129	-0.722302
FBgn0025741	NM_079898.2.2	216	154	158	125	159	170	4482.94	1950.69	2215.17	1585.67	2281.51	1842.36	2882.93	1903.18	1.5148	0.599124
FBgn0026077	NM_001104224.4.2	0	9	14	9	1	16	0	114.001	196.28	114.169	14.3491	173.398	103.427	100.639	1.02771	0.0394318
FBgn0026179	NM_206407.4.3	2	3	14	52	37	0	41.5087	38.0004	196.28	659.641	530.917	0	91.9298	396.853	0.231647	-2.11
FBgn0026239	NM_169845.5.5	21	13	2	9	83	19	435.841	164.668	28.0401	114.169	1190.98	205.91	209.516	503.685	0.415967	-1.26546
FBgn0026401	NM_001273774.10.9	27	0	48	59	50	64	560.367	0	672.962	748.438	717.456	693.593	411.11	719.829	0.571121	-0.808131
FBgn0026401	NM_001042987.18.17	13	43	0	0	37	17	269.806	544.672	0	0	530.917	184.236	271.493	238.384	1.13889	0.187625
FBgn0026401	NM_001042986.14.12	4	3	13	12	3	5	83.0173	38.0004	182.26	152.225	43.0474	54.1869	101.093	83.153	1.21574	0.281839
FBgn0027287	NM_001298345.2.2	19	0	9	0	0	1	394.332	0	126.18	0	0	10.8374	173.504	3.61246	48.0294	5.58585
FBgn0027335	NM_001169320.5.4	17	0	0	12	2	0	352.824	0	0	152.225	28.6982	0	117.608	60.3077	1.95013	0.963572
FBgn0027335	NM_001298482.6.4	0	0	0	3	1	12	0	0	0	38.0562	14.3491	130.049	0	60.818	0	#NUM!
FBgn0027528	NM_132932.4.2	87	43	78	205	160	116	1805.63	544.672	1093.56	2600.51	2295.86	1257.14	1147.95	2051.17	0.559659	-0.83738
FBgn0027561	NM_001259288.9.9	34	29	63	30	55	83	705.647	367.337	883.262	380.562	789.201	899.503	652.082	689.755	0.945382	-0.081031
FBgn0027561	NM_145873.9.7	22	0	6	0	0	0	456.595	0	84.1202	0	0	0	180.239	0	Inf	#VALUE!
FBgn0027561	NM_001259288.9.8	0	19	9	7	79	33	0	240.669	126.18	88.7978	1133.58	357.634	122.283	526.671	0.232181	-2.10668
FBgn0027561	NM_001259288.9.7	0	0	0	0	14	1	0	0	0	0	200.888	10.8374	0	70.575	0	#NUM!
FBgn0027581	NM_001274029.2.2	29	18	50	60	104	92	601.876	228.002	701.002	761.124	1492.31	997.039	510.293	1083.49	0.470972	-1.08629
FBgn0027585	NM_136567.3.2	31	31	74	33	34	63	643.384	392.67	1037.48	418.618	487.87	682.755	691.179	529.748	1.30473	0.383754
FBgn0027594	NM_001274347.6.5	8	3	0	20	0	39	166.035	38.0004	0	253.708	0	422.658	68.0117	225.455	0.301664	-1.72899
FBgn0027594	NM_001259620.4.2	0	0	0	17	0	1	0	0	0	215.652	0	10.8374	0	75.4964	0	#NUM!
FBgn0027596	NM_001103848.4.3	0	0	0	19	0	15	0	0	0	241.023	0	162.561	0	134.528	0	#NUM!
FBgn0027598	NM_001276195.4.2	11	0	4	2	6	0	228.298	0	56.0801	25.3708	86.0947	0	94.7926	37.1552	2.55126	1.35121
FBgn0027600	NM_135495.4.3	0	11	3	4	34	21	0	139.335	42.0601	50.7416	487.87	227.585	60.4649	255.399	0.236747	-2.07858
FBgn0027660	NM_170636.2.2	41	3	15	0	0	0	850.928	38.0004	210.301	0	0	0	366.41	0	Inf	#VALUE!
FBgn0027790	NM_139408.4.3	21	16	0	22	39	0	435.841	202.669	0	279.079	559.616	0	212.837	279.565	0.761314	-0.393436
FBgn0028341	NM_001014728.4.3	16	14	30	35	22	27	332.069	177.335	420.601	443.989	315.681	292.609	310.002	350.76	0.883801	-0.178206
FBgn0028550	NM_001272196.4.3	0	25	32	12	6	2	0	316.67	448.641	152.225	86.0947	21.6748	255.104	86.6647	2.94357	1.55757
FBgn0028717	NM_170246.2.2	0	40	91	252	172	156	0	506.672	1275.82	3196.72	2468.05	1690.63	594.165	2451.8	0.242338	-2.04491
FBgn0028991	NM_001032244.3.3	16	12	14	90	202	138	332.069	152.001	196.28	1141.69	2898.52	1495.56	226.784	1845.26	0.122901	-3.02443
FBgn0028993	NM_001110930.2.2	37	28	18	74	61	117	767.91	354.67	252.361	938.719	875.296	1267.97	458.314	1027.33	0.446121	-1.16449
FBgn0029662	NM_166973.2.2	0	47	9	52	52	29	0	595.339	126.18	659.641	746.154	314.284	240.506	573.36	0.419469	-1.25336
FBgn0029723	NM_001014724.4.3	0	20	0	43	10	45	0	253.336	0	545.472	143.491	487.682	84.4453	392.215	0.215303	-2.21556
FBgn0029723	NM_167020.3.3	0	0	0	22	0	27	0	0	0	279.079	0	292.609	0	190.563	0	#NUM!
FBgn0029791	NM_132019.6.2	0	0	0	24	27	9	0	0	0	304.45	387.426	97.5364	0	263.137	0	#NUM!
FBgn0029881	NM_001298020.6.4	16	35	12	11	36	14	332.069	443.338	168.24	139.539	516.568	151.723	314.549	269.277	1.16812	0.224195
FBgn0029922	NM_001298044.2.2	0	0	0	0	8	13	0	0	0	0	114.793	140.886	0	85.2263	0	#NUM!
FBgn0029979	NM_132196.3.2	0	0	0	6	0	7	0	0	0	76.1124	0	75.8617	0	50.658	0	#NUM!
FBgn0030052	NM_132265.4.3	0	12	0	0	49	25	0	152.001	0	0	703.107	270.935	50.6672	324.68	0.156052	-2.6799
FBgn0030052	NM_206662.6.3	0	0	0	24	0	10	0	0	0	304.45	0	108.374	0	137.608	0	#NUM!
FBgn0030065	NM_206663.3.2	0	5	0	86	115	147	0	63.3339	0	1090.94	1650.15	1593.1	21.1113	1444.73	0.0146126	-6.09664
FBgn0030087	NM_001258659.9.6	0	0	0	31	18	37	0	0	0	393.247	258.284	400.983	0	350.838	0	#NUM!
FBgn0030087	NM_132297.8.6	0	0	0	20	25	0	0	0	0	253.708	358.728	0	0	204.145	0	#NUM!
FBgn0030087	NM_176716.8.5	0	0	0	12	6	0	0	0	0	152.225	86.0947	0	0	79.4398	0	#NUM!
FBgn0030174	NM_132373.5.3	0	16	15	9	0	58	0	202.669	210.301	114.169	0	628.568	137.656	247.579	0.55601	-0.846817
FBgn0030336	NM_001298212.3.2	17	19	7	14	20	30	352.824	240.669	98.1402	177.596	286.982	325.121	230.544	263.233	0.875818	-0.191297
FBgn0030505	NM_001272597.7.4	47	0	0	34	33	32	975.454	0	0	431.304	473.521	346.796	325.151	417.207	0.779353	-0.359652
FBgn0030505	NM_001272597.3.2	13	44	0	40	23	57	269.806	557.339	0	507.416	330.03	617.731	275.715	485.059	0.568416	-0.814982
FBgn0030505	NM_001103504.8.4	0	0	0	11	5	0	0	0	0	139.539	71.7456	0	0	70.4283	0	#NUM!
FBgn0030520	NM_001103507.4.3	0	3	23	83	26	24	0	38.0004	322.461	1052.89	373.077	260.097	120.154	562.021	0.213789	-2.22574
FBgn0030608	NM_001298332.3.2	0	11	13	132	21	65	0	139.335	182.26	1674.47	301.331	704.43	107.198	893.411	0.119988	-3.05904
FBgn0030662	NM_206717.3.2	10	2	3	45	18	36	207.543	25.3336	42.0601	570.843	258.284	390.146	91.6457	406.424	0.225493	-2.14885
FBgn0030884	NM_133031.3.2	10	0	0	1	0	10	207.543	0	0	12.6854	0	108.374	69.1811	40.3531	1.7144	0.7777
FBgn0030925	NM_001103550.4.4	10	0	0	0	17	10	207.543	0	0	0	243.935	108.374	69.1811	117.436	0.589095	-0.763428
FBgn0030941	NM_167626.3.2	0	11	3	6	0	3	0	139.335	42.0601	76.1124	0	32.5121	60.4649	36.2082	1.66992	0.739783
FBgn0030964	NM_078683.5.2	0	0	0	8	0	9	0	0	0	101.483	0	97.5364	0	66.3399	0	#NUM!
FBgn0030976	NM_001103557.5.2	54	41	48	328	117	111	1120.73	519.338	672.962	4160.81	1678.85	1202.95	771.011	2347.54	0.328434	-1.60632
FBgn0031016	NM_167648.7.7	0	10	12	37	47	58	0	126.668	168.24	469.36	674.408	628.568	98.3028	590.779	0.166395	-2.58731
FBgn0031023	NM_133159.4.4	0	0	0	0	3	23	0	0	0	0	43.0474	249.26	0	97.4357	0	#NUM!
FBgn0031126	NM_001298571.2.2	0	0	0	30	10	14	0	0	0	380.562	143.491	151.723	0	225.259	0	#NUM!
FBgn0031195	NM_134625.4.2	48	39	45	85	19	75	996.208	494.005	630.902	1078.26	272.633	812.804	707.038	721.232	0.98032	-0.0286751
FBgn0031261	NM_080359.3.3	8	16	0	15	4	17	166.035	202.669	0	190.281	57.3965	184.236	122.901	143.971	0.853652	-0.22828
FBgn0031322	NM_001258904.5.2	17	21	25	13	0	24	352.824	266.003	350.501	164.91	0	260.097	323.109	141.669	2.28073	1.1895
FBgn0031374	NM_001103581.3.2	0	0	0	0	10	8	0	0	0	0	143.491	86.6991	0	76.7301	0	#NUM!
FBgn0031461	NM_001273038.3.2	0	10	0	2	15	11	0	126.668	0	25.3708	215.237	119.211	42.2226	119.94	0.352033	-1.50622
FBgn0031637	NM_135022.8.5	1	0	0	31	17	0	20.7543	0	0	393.247	243.935	0	6.91811	212.394	0.0325721	-4.94022
FBgn0031816	NM_001273204.2.2	33	18	21	10	2	4	684.893	228.002	294.421	126.854	28.6982	43.3495	402.439	66.3006	6.06991	2.60168
FBgn0031850	NM_164702.7.4	25	43	30	149	6	33	518.858	544.672	420.601	1890.12	86.0947	357.634	494.71	777.951	0.635915	-0.653095
FBgn0031850	NM_164702.7.3	0	12	17	38	10	15	0	152.001	238.341	482.045	143.491	162.561	130.114	262.699	0.495297	-1.01363
FBgn0031897	NM_001273246.4.3	3	0	4	10	4	0	62.263	0	56.0801	126.854	57.3965	0	39.4477	61.4168	0.642295	-0.638692
FBgn0032120	NM_205943.2.2	96	232	176	112	133	125	1992.42	2938.7	2467.53	1420.76	1908.43	1354.67	2466.21	1561.29	1.5796	0.659559
FBgn0032129	NM_001201829.3.2	0	0	2	25	24	29	0	0	28.0401	317.135	344.379	314.284	9.34669	325.266	0.0287355	-5.12102
FBgn0032330	NM_001273444.3.3	81	30	41	41	25	44	1681.1	380.004	574.821	520.101	358.728	476.845	878.642	451.891	1.94437	0.9593
FBgn0032330	NM_001273443.6.3	25	0	5	0	0	0	518.858	0	70.1002	0	0	0	196.32	0	Inf	#VALUE!
FBgn0032330	NM_001298899.6.3	0	27	0	48	77	0	0	342.003	0	608.899	1104.88	0	114.001	571.26	0.199561	-2.3251
FBgn0032363	NM_135661.4.2	9	0	0	15	0	6	186.789	0	0	190.281	0	65.0243	62.263	85.1018	0.73163	-0.450813
FBgn0032587	NM_165165.2.2	160	56	123	421	373	471	3320.69	709.34	1724.46	5340.55	5352.22	5104.41	1918.17	5265.73	0.364274	-1.4569
FBgn0032614	NM_001273594.3.2	6	10	18	0	0	0	124.526	126.668	252.361	0	0	0	167.852	0	Inf	#VALUE!
FBgn0032774	NM_001169543.5.3	128	111	122	257	250	225	2656.56	1406.01	1710.44	3260.15	3587.28	2438.41	1924.34	3095.28	0.621701	-0.685708
FBgn0032859	NM_001299173.5.2	11	12	14	0	0	8	228.298	152.001	196.28	0	0	86.6991	192.193	28.8997	6.65036	2.73343
FBgn0032910	NM_136237.7.4	53	48	63	115	72	82	1099.98	608.006	883.262	1458.82	1033.14	888.665	863.749	1126.87	0.7665	-0.383642
FBgn0032938	NM_001299195.5.3	0	25	13	0	11	40	0	316.67	182.26	0	157.84	433.495	166.31	197.112	0.843734	-0.245139
FBgn0032938	NM_001273740.7.3	16	11	0	0	0	0	332.069	139.335	0	0	0	0	157.135	0	Inf	#VALUE!
FBgn0033033	NM_165441.2.2	56	18	22	0	21	0	1162.24	228.002	308.441	0	301.331	0	566.229	100.444	5.63727	2.495
FBgn0033033	NM_165441.6.4	6	25	24	5	40	39	124.526	316.67	336.481	63.427	573.965	422.658	259.226	353.35	0.733623	-0.44689
FBgn0033033	NM_136336.3.2	2	4	8	24	27	20	41.5087	50.6672	112.16	304.45	387.426	216.748	68.112	302.874	0.224885	-2.15274
FBgn0033052	NM_176097.3.2	26	36	39	76	64	59	539.613	456.004	546.781	964.09	918.343	639.406	514.133	840.613	0.611617	-0.709301
FBgn0033195	NM_136456.3.2	10	0	0	0	4	10	207.543	0	0	0	57.3965	108.374	69.1811	55.2568	1.25199	0.324227
FBgn0033236	NM_176103.3.3	79	34	31	28	35	76	1639.59	430.671	434.621	355.191	502.219	823.641	834.962	560.35	1.49007	0.57538
FBgn0033246	NM_165581.4.2	0	2	22	4	0	0	0	25.3336	308.441	50.7416	0	0	111.258	16.9139	6.57792	2.71763
FBgn0033365	NM_001043068.4.3	0	0	0	6	4	18	0	0	0	76.1124	57.3965	195.073	0	109.527	0	#NUM!
FBgn0033438	NM_206066.3.2	0	0	0	14	11	10	0	0	0	177.596	157.84	108.374	0	147.937	0	#NUM!
FBgn0033524	NM_206081.4.2	0	0	0	0	25	2	0	0	0	0	358.728	21.6748	0	126.801	0	#NUM!
FBgn0033635	NM_001259337.4.2	0	26	11	0	0	0	0	329.337	154.22	0	0	0	161.186	0	Inf	#VALUE!
FBgn0033668	NM_136870.7.3	0	0	0	45	4	22	0	0	0	570.843	57.3965	238.422	0	288.887	0	#NUM!
FBgn0033744	NM_165907.11.7	4	0	23	5	0	4	83.0173	0	322.461	63.427	0	43.3495	135.159	35.5922	3.79745	1.92503
FBgn0033802	NM_001274016.6.2	30	27	16	117	14	149	622.63	342.003	224.321	1484.19	200.888	1614.77	396.318	1099.95	0.360306	-1.47271
FBgn0033987	NM_001299508.2.2	17	0	11	1	0	7	352.824	0	154.22	12.6854	0	75.8617	169.015	29.5157	5.72627	2.51759
FBgn0034021	NM_137195.2.2	0	0	0	35	42	29	0	0	0	443.989	602.663	314.284	0	453.645	0	#NUM!
FBgn0034071	NM_001299546.12.11	0	0	1	2	8	10	0	0	14.02	25.3708	114.793	108.374	4.67334	82.8459	0.0564101	-4.1479
FBgn0034184	NM_137339.5.5	5	0	7	9	0	0	103.772	0	98.1402	114.169	0	0	67.304	38.0562	1.76854	0.822561
FBgn0034253	NM_137395.4.3	39	9	25	52	15	1	809.419	114.001	350.501	659.641	215.237	10.8374	424.64	295.238	1.4383	0.524362
FBgn0034590	NM_001299732.2.2	295	307	321	324	377	325	6122.53	3888.7	4500.43	4110.07	5409.62	3522.15	4837.22	4347.28	1.1127	0.154066
FBgn0034598	NM_001299735.5.5	32	41	11	114	70	93	664.139	519.338	154.22	1446.14	1004.44	1007.88	445.899	1152.82	0.386791	-1.37037
FBgn0034644	NM_166466.2.2	19	1	8	46	5	14	394.332	12.6668	112.16	583.528	71.7456	151.723	173.053	268.999	0.643323	-0.636386
FBgn0034720	NM_001299787.5.3	12	0	0	9	0	8	249.052	0	0	114.169	0	86.6991	83.0173	66.9559	1.23988	0.310202
FBgn0034797	NM_079091.2.2	0	0	0	51	0	12	0	0	0	646.955	0	130.049	0	259.001	0	#NUM!
FBgn0034897	NM_137977.3.3	21	34	18	20	36	48	435.841	430.671	252.361	253.708	516.568	520.194	372.958	430.157	0.867027	-0.205851
FBgn0034903	NM_001144274.3.3	190	312	191	177	116	147	3943.32	3952.04	2677.83	2245.32	1664.5	1593.1	3524.4	1834.3	1.92138	0.942144
FBgn0034903	NM_001144274.3.2	6	11	0	1	10	14	124.526	139.335	0	12.6854	143.491	151.723	87.9536	102.633	0.856969	-0.222685
FBgn0035010	NM_001274240.4.2	13	0	15	0	0	0	269.806	0	210.301	0	0	0	160.036	0	Inf	#VALUE!
FBgn0035060	NM_001259573.9.6	75	88	79	185	130	131	1556.58	1114.68	1107.58	2346.8	1865.39	1419.7	1259.61	1877.29	0.670972	-0.575675
FBgn0035142	NM_167834.2.2	2	43	13	40	27	39	41.5087	544.672	182.26	507.416	387.426	422.658	256.147	439.167	0.583257	-0.777796
FBgn0035162	NM_167842.3.2	0	3	0	12	0	7	0	38.0004	0	152.225	0	75.8617	12.6668	76.0288	0.166605	-2.5855
FBgn0035227	NM_001274331.10.8	17	19	31	89	85	87	352.824	240.669	434.621	1129	1219.67	942.852	342.705	1097.18	0.312352	-1.67876
FBgn0035227	NM_167889.12.9	3	0	44	52	39	52	62.263	0	616.882	659.641	559.616	563.544	226.382	594.267	0.380943	-1.39235
FBgn0035227	NM_167889.13.9	19	18	0	6	9	70	394.332	228.002	0	76.1124	129.142	758.617	207.445	321.29	0.645662	-0.63115
FBgn0035236	NM_001299970.7.5	0	25	8	60	49	17	0	316.67	112.16	761.124	703.107	184.236	142.943	549.489	0.260139	-1.94265
FBgn0035379	NM_139496.3.2	5	20	7	45	1	10	103.772	253.336	98.1402	570.843	14.3491	108.374	151.749	231.189	0.656387	-0.607381
FBgn0035388	NM_139503.3.2	0	11	0	0	22	2	0	139.335	0	0	315.681	21.6748	46.4449	112.452	0.413021	-1.27571
FBgn0035539	NM_176283.2.2	76	70	65	70	85	32	1577.33	886.675	911.302	887.978	1219.67	346.796	1125.1	818.15	1.37518	0.45962
FBgn0035574	NM_168102.9.8	25	24	30	43	35	56	518.858	304.003	420.601	545.472	502.219	606.893	414.487	551.528	0.751525	-0.412106
FBgn0035574	NM_001274496.6.5	2	10	17	32	32	10	41.5087	126.668	238.341	405.933	459.172	108.374	135.506	324.493	0.417592	-1.25983
FBgn0035612	NM_001104040.6.4	23	0	0	3	0	16	477.35	0	0	38.0562	0	173.398	159.117	70.4848	2.25746	1.1747
FBgn0035612	NM_001104040.6.5	10	13	0	0	11	0	207.543	164.668	0	0	157.84	0	124.071	52.6134	2.35815	1.23766
FBgn0035630	NM_001300020.5.2	11	0	5	0	1	0	228.298	0	70.1002	0	14.3491	0	99.466	4.78304	20.7956	4.3782
FBgn0035802	NM_001274604.9.8	27	62	109	228	167	165	560.367	785.341	1528.18	2892.27	2396.3	1788.17	957.964	2358.91	0.406104	-1.30008
FBgn0035802	NM_001274604.3.2	17	0	27	10	0	53	352.824	0	378.541	126.854	0	574.381	243.788	233.745	1.04297	0.0606924
FBgn0035802	NM_206294.2.2	0	0	0	0	1	22	0	0	0	0	14.3491	238.422	0	84.2572	0	#NUM!
FBgn0035844	NM_139922.5.3	0	21	8	30	23	8	0	266.003	112.16	380.562	330.03	86.6991	126.054	265.764	0.47431	-1.0761
FBgn0035850	NM_001274636.5.2	0	8	37	0	8	0	0	101.334	518.741	0	114.793	0	206.692	38.2643	5.40169	2.43341
FBgn0035872	NM_001259736.5.3	7	0	4	0	0	0	145.28	0	56.0801	0	0	0	67.1202	0	Inf	#VALUE!
FBgn0035976	NM_168324.2.2	0	0	0	0	29	12	0	0	0	0	416.124	130.049	0	182.058	0	#NUM!
FBgn0035989	NM_170632.4.2	73	119	131	100	163	119	1515.07	1507.35	1836.62	1268.54	2338.91	1289.65	1619.68	1632.36	0.992229	-0.0112549
FBgn0036278	NM_001274826.2.2	14	3	0	12	32	9	290.561	38.0004	0	152.225	459.172	97.5364	109.52	236.311	0.463459	-1.10949
FBgn0036279	NM_140315.2.2	209	203	220	89	137	83	4337.66	2571.36	3084.41	1129	1965.83	899.503	3331.14	1331.44	2.5019	1.32302
FBgn0036318	NM_001144473.5.4	148	52	118	21	52	120	3071.64	658.673	1654.36	266.393	746.154	1300.49	1794.89	771.011	2.32797	1.21907
FBgn0036454	NM_206363.11.4	16	39	26	12	21	0	332.069	494.005	364.521	152.225	301.331	0	396.865	151.185	2.62502	1.39233
FBgn0036454	NM_206363.11.8	0	0	0	2	83	32	0	0	0	25.3708	1190.98	346.796	0	521.048	0	#NUM!
FBgn0036576	NM_140587.2.2	60	160	58	315	222	257	1245.26	2026.69	813.162	3995.9	3185.5	2785.21	1361.7	3322.2	0.409879	-1.28673
FBgn0036663	NM_001275044.3.2	0	26	40	47	0	46	0	329.337	560.801	596.214	0	498.52	296.713	364.911	0.813109	-0.298479
FBgn0036801	NM_001275088.8.4	15	14	47	10	22	20	311.315	177.335	658.942	126.854	315.681	216.748	382.531	219.761	1.74067	0.799641
FBgn0036801	NM_001275088.8.3	26	11	15	18	108	36	539.613	139.335	210.301	228.337	1549.7	390.146	296.416	722.729	0.410134	-1.28583
FBgn0036821	NM_168781.3.2	90	89	34	53	43	41	1867.89	1127.34	476.681	672.326	617.012	444.333	1157.31	577.89	2.00264	1.0019
FBgn0036934	NM_079452.2.2	12	2	65	0	7	3	249.052	25.3336	911.302	0	100.444	32.5121	395.229	44.3187	8.9179	3.1567
FBgn0037081	NM_168902.3.2	19	27	4	22	5	32	394.332	342.003	56.0801	279.079	71.7456	346.796	264.139	232.54	1.13588	0.183815
FBgn0037130	NM_001275263.3.2	0	0	6	11	0	10	0	0	84.1202	139.539	0	108.374	28.0401	82.6377	0.339313	-1.55931
FBgn0037153	NM_168948.6.4	0	1	0	4	54	0	0	12.6668	0	50.7416	774.852	0	4.22226	275.198	0.0153426	-6.02631
FBgn0037153	NM_168948.5.4	0	0	0	0	60	13	0	0	0	0	860.947	140.886	0	333.944	0	#NUM!
FBgn0037213	NM_141178.2.2	112	108	111	255	186	129	2324.49	1368.01	1556.22	3234.78	2668.94	1398.02	1749.57	2433.91	0.718832	-0.476273
FBgn0037215	NM_001275312.7.6	31	28	41	28	14	31	643.384	354.67	574.821	355.191	200.888	335.959	524.292	297.346	1.76324	0.818228
FBgn0037525	NM_169198.10.6	19	66	43	173	47	98	394.332	836.008	602.861	2194.57	674.408	1062.06	611.067	1310.35	0.46634	-1.10055
FBgn0037698	NM_001275487.4.3	16	0	0	7	0	6	332.069	0	0	88.7978	0	65.0243	110.69	51.274	2.15879	1.11022
FBgn0037705	NM_169291.3.3	208	190	258	262	426	233	4316.9	2406.69	3617.17	3323.57	6112.72	2525.11	3446.92	3987.14	0.86451	-0.210045
FBgn0037720	NM_001275499.3.2	14	72	59	21	43	22	290.561	912.009	827.182	266.393	617.012	238.422	676.584	373.943	1.80933	0.855452
FBgn0037992	NM_001260141.3.2	17	18	16	0	2	0	352.824	228.002	224.321	0	28.6982	0	268.382	9.56608	28.0556	4.81022
FBgn0038139	NM_169506.7.4	22	9	2	10	11	16	456.595	114.001	28.0401	126.854	157.84	173.398	199.546	152.697	1.3068	0.386042
FBgn0038181	NM_176498.9.9	11	17	0	0	0	0	228.298	215.335	0	0	0	0	147.878	0	Inf	#VALUE!
FBgn0038197	NM_142073.4.3	194	164	123	58	135	50	4026.34	2077.35	1724.46	735.753	1937.13	541.869	2609.39	1071.58	2.43507	1.28397
FBgn0038197	NM_142073.10.5	14	19	0	0	0	0	290.561	240.669	0	0	0	0	177.077	0	Inf	#VALUE!
FBgn0038237	NM_001300398.3.3	200	140	189	63	56	27	4150.87	1773.35	2649.79	799.18	803.551	292.609	2858	631.78	4.52373	2.17751
FBgn0038237	NM_142112.6.5	40	0	35	125	136	140	830.173	0	490.701	1585.67	1951.48	1517.23	440.292	1684.8	0.261332	-1.93604
FBgn0038237	NM_142112.6.4	47	8	0	22	0	29	975.454	101.334	0	279.079	0	314.284	358.929	197.788	1.81472	0.859748
FBgn0038237	NM_001300398.4.3	34	0	16	0	0	0	705.647	0	224.321	0	0	0	309.989	0	Inf	#VALUE!
FBgn0038237	NM_001300398.3.2	20	6	13	21	5	41	415.087	76.0007	182.26	266.393	71.7456	444.333	224.449	260.824	0.86054	-0.216686
FBgn0038237	NM_001275637.6.2	0	0	0	0	14	1	0	0	0	0	200.888	10.8374	0	70.575	0	#NUM!
FBgn0038679	NM_142524.3.3	0	0	0	0	12	13	0	0	0	0	172.189	140.886	0	104.358	0	#NUM!
FBgn0038755	NM_001275821.5.3	12	2	0	117	67	92	249.052	25.3336	0	1484.19	961.391	997.039	91.4619	1147.54	0.0797025	-3.64923
FBgn0038853	NM_142682.5.3	0	2	17	67	17	25	0	25.3336	238.341	849.922	243.935	270.935	87.8914	454.93	0.193197	-2.37185
FBgn0039249	NM_143054.4.2	0	14	0	0	37	1	0	177.335	0	0	530.917	10.8374	59.1117	180.585	0.327335	-1.61116
FBgn0039709	NM_001202382.4.2	91	74	49	66	38	86	1888.64	937.342	686.982	837.236	545.266	932.015	1170.99	771.506	1.5178	0.601979
FBgn0039776	NM_170492.4.3	22	26	16	14	0	25	456.595	329.337	224.321	177.596	0	270.935	336.751	149.51	2.25236	1.17144
FBgn0039776	NM_170492.7.5	0	2	10	10	0	0	0	25.3336	140.2	126.854	0	0	55.178	42.2847	1.30492	0.383958
FBgn0039852	NM_170552.7.6	0	0	0	0	16	6	0	0	0	0	229.586	65.0243	0	98.2034	0	#NUM!
FBgn0039890	NM_143649.8.7	0	62	0	1	23	0	0	785.341	0	12.6854	330.03	0	261.78	114.238	2.29153	1.19631
FBgn0039920	NM_001272141.2.2	0	5	2	25	26	13	0	63.3339	28.0401	317.135	373.077	140.886	30.458	277.033	0.109944	-3.18516
FBgn0039924	NM_001038716.8.2	0	0	0	1	3	21	0	0	0	12.6854	43.0474	227.585	0	94.4393	0	#NUM!
FBgn0039927	NM_166824.8.5	24	82	45	106	72	30	498.104	1038.68	630.902	1344.65	1033.14	325.121	722.561	900.97	0.801981	-0.31836
FBgn0039927	NM_166825.3.2	1	5	0	18	2	22	20.7543	63.3339	0	228.337	28.6982	238.422	28.0294	165.153	0.169718	-2.55879
FBgn0039928	NM_001272157.5.3	51	72	93	126	165	83	1058.47	912.009	1303.86	1598.36	2367.6	899.503	1091.45	1621.82	0.672976	-0.571373
FBgn0039955	NM_001015359.2.2	16	5	14	13	0	8	332.069	63.3339	196.28	164.91	0	86.6991	197.228	83.8697	2.3516	1.23364
FBgn0039955	NM_001110980.2.2	0	1	15	0	0	0	0	12.6668	210.301	0	0	0	74.3224	0	Inf	#VALUE!
FBgn0040370	NM_001169157.3.2	5	16	0	2	0	1	103.772	202.669	0	25.3708	0	10.8374	102.147	12.0694	8.46329	3.08122
FBgn0040752	NM_001299473.3.3	1	0	68	0	0	0	20.7543	0	953.362	0	0	0	324.706	0	Inf	#VALUE!
FBgn0040752	NM_001299473.3.2	8	0	4	0	0	0	166.035	0	56.0801	0	0	0	74.0383	0	Inf	#VALUE!
FBgn0040765	NM_001299374.2.2	39	12	0	62	0	70	809.419	152.001	0	786.495	0	758.617	320.474	515.037	0.622234	-0.684471
FBgn0040765	NM_001299374.4.3	10	13	0	2	3	29	207.543	164.668	0	25.3708	43.0474	314.284	124.071	127.567	0.972588	-0.0400992
FBgn0041092	NM_001273351.4.3	516	419	453	1169	981	1064	10709.2	5307.38	6351.08	14829.2	14076.5	11531	7455.9	13478.9	0.553154	-0.854248
FBgn0041604	NM_206353.5.4	0	14	24	34	44	0	0	177.335	336.481	431.304	631.361	0	171.272	354.222	0.483517	-1.04836
FBgn0041604	NM_079347.3.2	3	0	9	0	0	11	62.263	0	126.18	0	0	119.211	62.8144	39.7371	1.58075	0.660611
FBgn0041604	NM_206353.5.2	0	0	0	9	9	20	0	0	0	114.169	129.142	216.748	0	153.353	0	#NUM!
FBgn0042135	NM_001273861.7.2	0	0	12	19	15	18	0	0	168.24	241.023	215.237	195.073	56.0801	217.111	0.258302	-1.95287
FBgn0042135	NM_165552.9.2	0	5	0	29	16	11	0	63.3339	0	367.877	229.586	119.211	21.1113	238.891	0.0883721	-3.50027
FBgn0043792	NM_001259583.3.2	96	91	96	29	0	32	1992.42	1152.68	1345.92	367.877	0	346.796	1497.01	238.224	6.28402	2.65169
FBgn0043841	NM_165010.4.2	29	17	32	134	162	183	601.876	215.335	448.641	1699.84	2324.56	1983.24	421.951	2002.55	0.210707	-2.24669
FBgn0043841	NM_165010.4.3	0	0	0	74	52	12	0	0	0	938.719	746.154	130.049	0	604.974	0	#NUM!
FBgn0045852	NM_001259152.2.2	0	17	0	20	27	13	0	215.335	0	253.708	387.426	140.886	71.7785	260.673	0.275358	-1.86062
FBgn0046706	NM_001015349.4.3	56	45	34	38	43	50	1162.24	570.006	476.681	482.045	617.012	541.869	736.31	546.975	1.34615	0.428837
FBgn0046874	NM_001275458.6.3	0	10	7	0	0	0	0	126.668	98.1402	0	0	0	74.936	0	Inf	#VALUE!
FBgn0050015	NM_001273944.4.3	182	154	65	98	67	121	3777.29	1950.69	911.302	1243.17	961.391	1311.32	2213.09	1171.96	1.88837	0.917139
FBgn0050021	NM_001144170.7.6	0	13	7	0	7	0	0	164.668	98.1402	0	100.444	0	87.6028	33.4813	2.61647	1.38762
FBgn0050021	NM_001144171.6.5	2	0	0	6	0	7	41.5087	0	0	76.1124	0	75.8617	13.8362	50.658	0.27313	-1.87234
FBgn0050115	NM_137499.7.2	10	4	0	12	5	21	207.543	50.6672	0	152.225	71.7456	227.585	86.0702	150.518	0.571825	-0.806355
FBgn0050147	NM_137649.4.2	44	71	64	0	0	0	913.191	899.342	897.282	0	0	0	903.272	0	Inf	#VALUE!
FBgn0050377	NM_136485.4.4	124	69	100	40	95	64	2573.54	874.009	1402	507.416	1363.17	693.593	1616.52	854.725	1.89127	0.919356
FBgn0050377	NM_136485.4.3	3	0	3	3	0	18	62.263	0	42.0601	38.0562	0	195.073	34.7744	77.7097	0.447491	-1.16007
FBgn0050440	NM_136328.6.4	0	0	0	3	19	34	0	0	0	38.0562	272.633	368.471	0	226.387	0	#NUM!
FBgn0050456	NM_137344.2.2	21	1	6	0	5	23	435.841	12.6668	84.1202	0	71.7456	249.26	177.543	107.002	1.65925	0.730531
FBgn0050463	NM_001103871.5.4	25	8	11	0	0	0	518.858	101.334	154.22	0	0	0	258.138	0	Inf	#VALUE!
FBgn0050463	NM_166188.6.4	0	4	12	0	0	5	0	50.6672	168.24	0	0	54.1869	72.9692	18.0623	4.03986	2.01431
FBgn0050497	NM_001370031.2.2	11	16	6	60	15	34	228.298	202.669	84.1202	761.124	215.237	368.471	171.696	448.277	0.383012	-1.38454
FBgn0051038	NM_001276158.3.2	24	11	6	6	0	14	498.104	139.335	84.1202	76.1124	0	151.723	240.52	75.9452	3.16701	1.66312
FBgn0051038	NM_001276157.3.3	0	0	0	11	0	2	0	0	0	139.539	0	21.6748	0	53.738	0	#NUM!
FBgn0051072	NM_170290.11.10	0	7	15	22	4	30	0	88.6675	210.301	279.079	57.3965	325.121	99.656	220.532	0.451889	-1.14596
FBgn0051092	NM_001104458.5.2	133	86	109	112	94	144	2760.33	1089.34	1528.18	1420.76	1348.82	1560.58	1792.62	1443.39	1.24195	0.312609
FBgn0051092	NM_170239.2.2	0	38	44	26	24	23	0	481.338	616.882	329.82	344.379	249.26	366.073	307.82	1.18925	0.250047
FBgn0051092	NM_170239.3.2	0	28	10	31	4	0	0	354.67	140.2	393.247	57.3965	0	164.957	150.215	1.09814	0.135063
FBgn0051116	NM_001104281.2.2	39	27	40	0	18	9	809.419	342.003	560.801	0	258.284	97.5364	570.741	118.607	4.81204	2.26665
FBgn0051140	NM_001275964.8.8	0	0	3	1	9	13	0	0	42.0601	12.6854	129.142	140.886	14.02	94.2378	0.148773	-2.74882
FBgn0051145	NM_001144630.9.8	0	0	34	0	31	17	0	0	476.681	0	444.823	184.236	158.894	209.686	0.75777	-0.400169
FBgn0051146	NM_169191.6.3	27	115	135	82	43	156	560.367	1456.68	1892.7	1040.2	617.012	1690.63	1303.25	1115.95	1.16784	0.223844
FBgn0051146	NM_169191.8.7	0	4	31	13	5	21	0	50.6672	434.621	164.91	71.7456	227.585	161.763	154.747	1.04534	0.0639686
FBgn0051146	NM_001260037.2.2	0	0	25	12	6	1	0	0	350.501	152.225	86.0947	10.8374	116.834	83.0523	1.40675	0.492364
FBgn0051146	NM_169191.8.2	0	0	0	1	0	14	0	0	0	12.6854	0	151.723	0	54.8029	0	#NUM!
FBgn0051163	NM_001043277.4.4	0	3	12	12	21	4	0	38.0004	168.24	152.225	301.331	43.3495	68.7469	165.635	0.41505	-1.26864
FBgn0051475	NM_001275796.2.2	39	55	20	235	331	377	809.419	696.673	280.401	2981.07	4749.56	4085.69	595.498	3938.77	0.151189	-2.72558
FBgn0051522	NM_001259978.4.2	0	0	0	12	0	3	0	0	0	152.225	0	32.5121	0	61.579	0	#NUM!
FBgn0051694	NM_164511.3.2	5	18	11	21	14	0	103.772	228.002	154.22	266.393	200.888	0	161.998	155.76	1.04005	0.0566491
FBgn0051721	NM_164935.5.2	4	12	0	0	0	0	83.0173	152.001	0	0	0	0	78.3396	0	Inf	#VALUE!
FBgn0052016	NM_166796.7.4	0	31	4	0	0	6	0	392.67	56.0801	0	0	65.0243	149.584	21.6748	6.90128	2.78686
FBgn0052017	NM_001169364.6.2	0	2	0	11	0	9	0	25.3336	0	139.539	0	97.5364	8.44453	79.0253	0.106859	-3.22623
FBgn0052062	NM_001259778.11.11	0	0	0	67	37	0	0	0	0	849.922	530.917	0	0	460.28	0	#NUM!
FBgn0052082	NM_001104112.2.2	264	418	238	648	620	780	5479.15	5294.72	3336.77	8220.14	8896.45	8453.16	4703.54	8523.25	0.551849	-0.857655
FBgn0052085	NM_168470.4.2	0	0	12	23	17	5	0	0	168.24	291.764	243.935	54.1869	56.0801	196.629	0.285208	-1.80991
FBgn0052085	NM_168470.2.2	6	0	0	25	1	17	124.526	0	0	317.135	14.3491	184.236	41.5087	171.907	0.241461	-2.05014
FBgn0052091	NM_168468.2.2	0	0	22	15	27	0	0	0	308.441	190.281	387.426	0	102.814	192.569	0.533905	-0.905345
FBgn0052103	NM_168498.5.2	33	4	20	4	28	8	684.893	50.6672	280.401	50.7416	401.775	86.6991	338.654	179.739	1.88414	0.91391
FBgn0052103	NM_206345.2.2	0	0	0	4	1	8	0	0	0	50.7416	14.3491	86.6991	0	50.5966	0	#NUM!
FBgn0052264	NM_001104024.2.2	0	0	34	57	42	45	0	0	476.681	723.068	602.663	487.682	158.894	604.471	0.262864	-1.92761
FBgn0052296	NM_001144407.3.2	206	121	147	207	153	145	4275.39	1532.68	2060.95	2625.88	2195.41	1571.42	2623.01	2130.9	1.23094	0.299756
FBgn0052311	NM_001043113.7.6	41	30	0	43	16	75	850.928	380.004	0	545.472	229.586	812.804	410.311	529.287	0.775213	-0.367335
FBgn0052311	NM_001274388.12.12	0	9	0	26	0	10	0	114.001	0	329.82	0	108.374	38.0004	146.065	0.260161	-1.94252
FBgn0052311	NM_206240.7.3	0	0	0	10	5	0	0	0	0	126.854	71.7456	0	0	66.1999	0	#NUM!
FBgn0052333	NM_001274317.4.2	17	14	67	42	14	51	352.824	177.335	939.342	532.787	200.888	552.707	489.834	428.794	1.14235	0.192009
FBgn0052369	NM_001259731.2.2	68	77	34	66	26	34	1411.29	975.343	476.681	837.236	373.077	368.471	954.44	526.261	1.81362	0.858874
FBgn0052423	NM_001259707.3.3	15	0	0	3	0	13	311.315	0	0	38.0562	0	140.886	103.772	59.6474	1.73975	0.798882
FBgn0052499	NM_167788.7.6	31	73	68	36	38	27	643.384	924.676	953.362	456.674	545.266	292.609	840.474	431.517	1.94772	0.961787
FBgn0052499	NM_167788.5.4	9	11	0	9	39	1	186.789	139.335	0	114.169	559.616	10.8374	108.708	228.207	0.476356	-1.06989
FBgn0052654	NM_001298228.2.2	0	4	18	0	0	0	0	50.6672	252.361	0	0	0	101.009	0	Inf	#VALUE!
FBgn0052982	NM_001042884.3.2	0	0	0	37	42	0	0	0	0	469.36	602.663	0	0	357.341	0	#NUM!
FBgn0053111	NM_001014646.7.3	411	341	402	460	387	390	8530.03	4319.38	5636.05	5835.28	5553.11	4226.58	6161.82	5204.99	1.18383	0.243461
FBgn0053111	NM_001275958.8.3	0	12	0	9	0	18	0	152.001	0	114.169	0	195.073	50.6672	103.08	0.49153	-1.02465
FBgn0053143	NM_001299804.6.4	0	0	0	11	0	13	0	0	0	139.539	0	140.886	0	93.4751	0	#NUM!
FBgn0053144	NM_176144.4.3	111	33	43	60	113	110	2303.73	418.004	602.861	761.124	1621.45	1192.11	1108.2	1191.56	0.930039	-0.104637
FBgn0053144	NM_176144.4.2	5	0	0	23	33	18	103.772	0	0	291.764	473.521	195.073	34.5906	320.119	0.108055	-3.21016
FBgn0053554	NM_001316406.10.8	0	0	20	8	21	13	0	0	280.401	101.483	301.331	140.886	93.4669	181.234	0.515726	-0.955323
FBgn0053556	NM_001104057.3.2	21	8	26	72	64	115	435.841	101.334	364.521	913.349	918.343	1246.3	300.565	1026	0.29295	-1.77128
FBgn0053653	NM_001031860.22.19	17	8	0	0	0	0	352.824	101.334	0	0	0	0	151.386	0	Inf	#VALUE!
FBgn0053653	NM_001031859.19.15	0	0	0	8	5	0	0	0	0	101.483	71.7456	0	0	57.7429	0	#NUM!
FBgn0058006	NM_001042936.6.5	55	46	64	113	114	57	1141.49	582.672	897.282	1433.45	1635.8	617.731	873.814	1228.99	0.711	-0.492078
FBgn0058006	NM_001042936.9.8	45	40	31	97	0	49	933.945	506.672	434.621	1230.48	0	531.032	625.079	587.172	1.06456	0.0902566
FBgn0058006	NM_001042936.7.5	2	15	0	2	24	7	41.5087	190.002	0	25.3708	344.379	75.8617	77.1702	148.537	0.519535	-0.944708
FBgn0058006	NM_001042936.4.2	0	14	0	52	31	77	0	177.335	0	659.641	444.823	834.478	59.1117	646.314	0.0914597	-3.45072
FBgn0058178	NM_001015187.6.3	8	11	36	101	19	84	166.035	139.335	504.721	1281.23	272.633	910.34	270.03	821.399	0.328744	-1.60496
FBgn0058178	NM_001015188.4.3	23	10	5	31	59	31	477.35	126.668	70.1002	393.247	846.598	335.959	224.706	525.268	0.427793	-1.22502
FBgn0058178	NM_001276235.6.4	0	1	17	0	0	0	0	12.6668	238.341	0	0	0	83.6691	0	Inf	#VALUE!
FBgn0058178	NM_001015187.6.4	5	2	0	33	2	1	103.772	25.3336	0	418.618	28.6982	10.8374	43.0351	152.718	0.281795	-1.82728
FBgn0058178	NM_001015188.4.2	0	0	0	27	30	4	0	0	0	342.506	430.474	43.3495	0	272.11	0	#NUM!
FBgn0058263	NM_001276229.4.3	26	26	28	45	32	75	539.613	329.337	392.561	570.843	459.172	812.804	420.503	614.273	0.684555	-0.546762
FBgn0058263	NM_001015095.5.4	0	1	10	1	0	2	0	12.6668	140.2	12.6854	0	21.6748	50.9557	11.4534	4.44896	2.15347
FBgn0062413	NM_001258622.5.2	2	0	19	15	2	0	41.5087	0	266.381	190.281	28.6982	0	102.63	72.9931	1.40602	0.491618
FBgn0063649	NM_001260204.4.3	14	28	48	217	155	277	290.561	354.67	672.962	2752.73	2224.11	3001.96	439.398	2659.6	0.165212	-2.59761
FBgn0063649	NM_001260205.6.5	0	0	0	18	0	1	0	0	0	228.337	0	10.8374	0	79.7248	0	#NUM!
FBgn0083940	NM_001042802.4.4	0	0	4	0	20	29	0	0	56.0801	0	286.982	314.284	18.6934	200.422	0.09327	-3.42244
FBgn0083962	NM_001042870.16.8	0	7	10	0	0	0	0	88.6675	140.2	0	0	0	76.2893	0	Inf	#VALUE!
FBgn0085390	NM_165568.7.5	0	0	0	17	0	1	0	0	0	215.652	0	10.8374	0	75.4964	0	#NUM!
FBgn0085404	NM_001275926.3.2	7	0	35	8	0	0	145.28	0	490.701	101.483	0	0	211.994	33.8277	6.26687	2.64774
FBgn0085407	NM_001298777.3.2	18	0	3	0	0	0	373.578	0	42.0601	0	0	0	138.546	0	Inf	#VALUE!
FBgn0085407	NM_001103637.4.3	0	0	0	0	9	15	0	0	0	0	129.142	162.561	0	97.2343	0	#NUM!
FBgn0085424	NM_001103683.2.2	59	14	56	7	42	13	1224.51	177.335	785.122	88.7978	602.663	140.886	728.988	277.449	2.62747	1.39367
FBgn0085426	NM_001032275.6.3	86	205	145	42	0	23	1784.87	2596.69	2032.91	532.787	0	249.26	2138.16	260.682	8.20216	3.036
FBgn0085442	NM_166693.5.2	0	15	14	0	0	0	0	190.002	196.28	0	0	0	128.761	0	Inf	#VALUE!
FBgn0085443	NM_001272487.4.4	68	97	143	254	108	65	1411.29	1228.68	2004.86	3222.09	1549.7	704.43	1548.28	1825.41	0.848182	-0.237553
FBgn0086347	NM_078814.4.3	25	0	2	0	0	4	518.858	0	28.0401	0	0	43.3495	182.299	14.4498	12.616	3.65718
FBgn0086676	NM_080084.4.2	33	8	0	0	22	2	684.893	101.334	0	0	315.681	21.6748	262.076	112.452	2.33056	1.22068
FBgn0086676	NM_080084.8.5	21	3	0	20	0	0	435.841	38.0004	0	253.708	0	0	157.947	84.5693	1.86767	0.901236
FBgn0086711	NM_001042899.4.2	269	181	197	71	33	42	5582.92	2292.69	2761.95	900.663	473.521	455.17	3545.85	609.785	5.81492	2.53976
FBgn0086711	NM_165094.5.4	13	7	0	19	10	28	269.806	88.6675	0	241.023	143.491	303.447	119.491	229.32	0.521068	-0.940457
FBgn0086711	NM_165094.5.5	0	0	0	14	0	8	0	0	0	177.596	0	86.6991	0	88.0982	0	#NUM!
FBgn0086758	NM_001201751.3.3	37	42	59	83	120	103	767.91	532.005	827.182	1052.89	1721.89	1116.25	709.033	1297.01	0.546667	-0.871267
FBgn0087011	NM_001201534.3.2	0	9	0	4	20	0	0	114.001	0	50.7416	286.982	0	38.0004	112.575	0.337557	-1.5668
FBgn0087012	NM_169011.5.3	23	0	19	0	37	21	477.35	0	266.381	0	530.917	227.585	247.91	252.834	0.980525	-0.0283739
FBgn0243486	NM_001299095.11.7	0	0	4	0	35	8	0	0	56.0801	0	502.219	86.6991	18.6934	196.306	0.0952257	-3.39251
FBgn0243512	NM_079549.3.2	131	113	83	82	27	32	2718.82	1431.35	1163.66	1040.2	387.426	346.796	1771.28	591.475	2.99468	1.5824
FBgn0250907	NM_001273768.8.6	12	3	31	20	15	0	249.052	38.0004	434.621	253.708	215.237	0	240.558	156.315	1.53893	0.621928
FBgn0250907	NM_001273769.5.3	8	20	13	2	27	7	166.035	253.336	182.26	25.3708	387.426	75.8617	200.544	162.886	1.23119	0.300052
FBgn0259143	NM_132574.3.2	2	15	33	0	0	0	41.5087	190.002	462.661	0	0	0	231.391	0	Inf	#VALUE!
FBgn0259163	NM_168368.2.2	0	0	1	13	28	12	0	0	14.02	164.91	401.775	130.049	4.67334	232.245	0.0201225	-5.63505
FBgn0259163	NM_001274723.6.2	0	0	0	0	7	6	0	0	0	0	100.444	65.0243	0	55.156	0	#NUM!
FBgn0259171	NM_132606.3.3	0	0	0	28	2	23	0	0	0	355.191	28.6982	249.26	0	211.05	0	#NUM!
FBgn0259176	NM_001042892.6.6	16	0	1	20	14	12	332.069	0	14.02	253.708	200.888	130.049	115.363	194.881	0.591966	-0.756414
FBgn0259179	NM_137876.6.2	0	0	0	23	3	1	0	0	0	291.764	43.0474	10.8374	0	115.216	0	#NUM!
FBgn0259211	NM_057497.2.2	86	61	99	12	14	30	1784.87	772.674	1387.98	152.225	200.888	325.121	1315.18	226.078	5.81736	2.54036
FBgn0259211	NM_057497.5.4	12	13	19	0	0	6	249.052	164.668	266.381	0	0	65.0243	226.7	21.6748	10.4592	3.3867
FBgn0259234	NM_001169627.3.2	9	0	10	0	0	0	186.789	0	140.2	0	0	0	108.996	0	Inf	#VALUE!
FBgn0259481	NM_168461.2.2	0	26	0	15	2	60	0	329.337	0	190.281	28.6982	650.243	109.779	289.741	0.378886	-1.40016
FBgn0259685	NM_001043286.3.2	0	42	19	0	22	16	0	532.005	266.381	0	315.681	173.398	266.129	163.026	1.63243	0.707019
FBgn0259821	NM_001144066.5.3	0	16	6	3	0	16	0	202.669	84.1202	38.0562	0	173.398	95.5963	70.4848	1.35627	0.439643
FBgn0259984	NM_001103690.5.4	0	22	0	13	38	49	0	278.669	0	164.91	545.266	531.032	92.8898	413.736	0.224515	-2.15512
FBgn0260653	NM_168811.3.2	3	16	43	24	28	5	62.263	202.669	602.861	304.45	401.775	54.1869	289.264	253.471	1.14121	0.19057
FBgn0260794	NM_141239.4.4	26	9	28	116	107	101	539.613	114.001	392.561	1471.51	1535.36	1094.58	348.725	1367.15	0.255075	-1.97101
FBgn0260798	NM_001299206.5.2	4	69	44	41	58	23	83.0173	874.009	616.882	520.101	832.249	249.26	524.636	533.87	0.982703	-0.0251721
FBgn0260798	NM_001299206.10.8	30	8	17	22	4	0	622.63	101.334	238.341	279.079	57.3965	0	320.768	112.158	2.85996	1.51599
FBgn0260798	NM_001169580.13.12	3	3	31	0	0	10	62.263	38.0004	434.621	0	0	108.374	178.295	36.1246	4.93555	2.30321
FBgn0260799	NM_001042979.3.3	15	7	1	30	0	4	311.315	88.6675	14.02	380.562	0	43.3495	138.001	141.304	0.976625	-0.034123
FBgn0260799	NM_001042979.3.2	1	3	5	1	9	2	20.7543	38.0004	70.1002	12.6854	129.142	21.6748	42.9516	54.5007	0.788093	-0.343563
FBgn0260866	NM_137836.2.2	0	0	0	0	5	23	0	0	0	0	71.7456	249.26	0	107.002	0	#NUM!
FBgn0260936	NM_168132.3.2	40	42	0	26	32	66	830.173	532.005	0	329.82	459.172	715.267	454.06	501.42	0.905548	-0.143137
FBgn0260970	NM_001272389.6.3	15	24	0	28	4	0	311.315	304.003	0	355.191	57.3965	0	205.106	137.529	1.49136	0.576632
FBgn0260987	NM_001015132.6.3	1	0	0	0	13	2	20.7543	0	0	0	186.539	21.6748	6.91811	69.4044	0.0996783	-3.32658
FBgn0260997	NM_001170386.3.2	17	10	2	11	48	32	352.824	126.668	28.0401	139.539	688.758	346.796	169.177	391.698	0.431908	-1.21121
FBgn0261053	NM_001260104.6.3	0	0	0	4	2	18	0	0	0	50.7416	28.6982	195.073	0	91.5042	0	#NUM!
FBgn0261113	NM_001275790.3.2	11	43	30	31	14	68	228.298	544.672	420.601	393.247	200.888	736.942	397.857	443.692	0.896695	-0.15731
FBgn0261258	NM_001275227.5.2	0	38	4	0	12	20	0	481.338	56.0801	0	172.189	216.748	179.139	129.646	1.38176	0.466508
FBgn0261261	NM_001170040.5.4	0	80	84	99	78	83	0	1013.34	1177.68	1255.85	1119.23	899.503	730.342	1091.53	0.6691	-0.579707
FBgn0261261	NM_001275369.2.2	0	0	0	2	11	0	0	0	0	25.3708	157.84	0	0	61.0704	0	#NUM!
FBgn0261341	NM_168809.4.3	0	0	0	10	0	24	0	0	0	126.854	0	260.097	0	128.984	0	#NUM!
FBgn0261403	NM_165426.6.3	38	17	21	27	23	35	788.665	215.335	294.421	342.506	330.03	379.308	432.807	350.615	1.23442	0.303838
FBgn0261403	NM_165426.6.4	14	11	12	37	6	23	290.561	139.335	168.24	469.36	86.0947	249.26	199.379	268.238	0.74329	-0.428003
FBgn0261545	NM_001201986.2.2	56	52	79	91	6	73	1162.24	658.673	1107.58	1154.37	86.0947	791.129	976.166	677.198	1.44148	0.527549
FBgn0261552	NM_001275486.2.2	31	129	82	70	125	208	643.384	1634.02	1149.64	887.978	1793.64	2254.18	1142.35	1645.26	0.694325	-0.526318
FBgn0261552	NM_001300324.2.2	0	0	0	1	11	0	0	0	0	12.6854	157.84	0	0	56.8419	0	#NUM!
FBgn0261555	NM_168352.2.2	0	0	0	15	2	15	0	0	0	190.281	28.6982	162.561	0	127.18	0	#NUM!
FBgn0261556	NM_001144514.4.4	20	6	0	25	0	0	415.087	76.0007	0	317.135	0	0	163.696	105.712	1.54851	0.630883
FBgn0261556	NM_001144513.3.3	0	0	0	0	46	38	0	0	0	0	660.059	411.821	0	357.293	0	#NUM!
FBgn0261565	NM_206388.5.3	165	181	219	17	21	28	3424.47	2292.69	3070.39	215.652	301.331	303.447	2929.18	273.477	10.7109	3.42101
FBgn0261565	NM_206388.5.4	0	0	0	20	0	58	0	0	0	253.708	0	628.568	0	294.092	0	#NUM!
FBgn0261588	NM_001299264.2.2	7	0	13	16	3	6	145.28	0	182.26	202.966	43.0474	65.0243	109.18	103.679	1.05306	0.0745838
FBgn0261618	NM_170365.2.2	534	472	640	1086	1206	1080	11082.8	5978.72	8972.82	13776.3	17305	11704.4	8678.12	14261.9	0.608482	-0.716713
FBgn0261703	NM_001201664.3.3	197	198	120	139	89	95	4088.6	2508.02	1682.4	1763.27	1277.07	1029.55	2759.68	1356.63	2.03421	1.02447
FBgn0261801	NM_139788.3.3	0	0	10	11	2	0	0	0	140.2	139.539	28.6982	0	46.7334	56.0792	0.833347	-0.26301
FBgn0261854	NM_001043080.3.2	0	8	8	13	8	0	0	101.334	112.16	164.91	114.793	0	71.1649	93.2344	0.76329	-0.389697
FBgn0261963	NM_135083.2.2	30	5	11	68	49	49	622.63	63.3339	154.22	862.607	703.107	531.032	280.061	698.915	0.400709	-1.31937
FBgn0261988	NM_001276214.2.2	9	2	2	37	34	10	186.789	25.3336	28.0401	469.36	487.87	108.374	80.0542	355.201	0.225377	-2.14959
FBgn0261988	NM_001276214.7.3	0	0	0	4	22	0	0	0	0	50.7416	315.681	0	0	122.141	0	#NUM!
FBgn0262029	NM_001201801.3.2	16	0	7	22	21	1	332.069	0	98.1402	279.079	301.331	10.8374	143.403	197.083	0.72763	-0.458723
FBgn0262114	NM_001273938.2.2	1	17	14	11	19	0	20.7543	215.335	196.28	139.539	272.633	0	144.123	137.391	1.049	0.0690187
FBgn0262114	NM_001316413.2.2	0	0	0	0	34	3	0	0	0	0	487.87	32.5121	0	173.461	0	#NUM!
FBgn0262123	NM_001110887.3.2	1	10	0	0	0	0	20.7543	126.668	0	0	0	0	49.1407	0	Inf	#VALUE!
FBgn0262124	NM_001276233.6.5	56	38	17	60	31	57	1162.24	481.338	238.341	761.124	444.823	617.731	627.307	607.892	1.03194	0.045356
FBgn0262124	NM_001110921.4.4	51	18	22	28	39	36	1058.47	228.002	308.441	355.191	559.616	390.146	531.638	434.984	1.2222	0.289482
FBgn0262124	NM_001301215.9.7	0	8	16	12	0	22	0	101.334	224.321	152.225	0	238.422	108.552	130.216	0.833629	-0.262522
FBgn0262169	NM_165730.8.6	0	3	2	66	58	46	0	38.0004	28.0401	837.236	832.249	498.52	22.0135	722.668	0.0304614	-5.03687
FBgn0262169	NM_001103784.5.4	0	0	0	0	3	12	0	0	0	0	43.0474	130.049	0	57.6986	0	#NUM!
FBgn0262562	NM_001275755.5.4	40	22	12	0	10	57	830.173	278.669	168.24	0	143.491	617.731	425.694	253.741	1.67768	0.746463
FBgn0262579	NM_001104075.9.9	322	350	447	18	5	4	6682.9	4433.38	6266.96	228.337	71.7456	43.3495	5794.41	114.477	50.6162	5.66153
FBgn0262579	NM_001104071.4.3	31	51	63	78	99	140	643.384	646.006	883.262	989.461	1420.56	1517.23	724.218	1309.09	0.553224	-0.854064
FBgn0262579	NM_001259733.3.2	6	0	41	11	0	27	124.526	0	574.821	139.539	0	292.609	233.116	144.05	1.6183	0.694482
FBgn0262582	NM_001275826.6.2	25	15	25	15	10	6	518.858	190.002	350.501	190.281	143.491	65.0243	353.12	132.932	2.6564	1.40947
FBgn0262656	NM_080323.2.2	0	0	19	4	10	4	0	0	266.381	50.7416	143.491	43.3495	88.7936	79.1941	1.12121	0.165062
FBgn0262699	NM_080113.3.2	0	24	13	42	11	59	0	304.003	182.26	532.787	157.84	639.406	162.088	443.344	0.365603	-1.45165
FBgn0262717	NM_001260098.3.2	0	13	10	3	8	9	0	164.668	140.2	38.0562	114.793	97.5364	101.623	83.4619	1.2176	0.284036
FBgn0262738	NM_001297931.4.3	0	8	0	27	80	0	0	101.334	0	342.506	1147.93	0	33.7781	496.812	0.0679898	-3.87854
FBgn0262738	NM_001169190.6.4	0	0	0	11	33	0	0	0	0	139.539	473.521	0	0	204.353	0	#NUM!
FBgn0262870	NM_001259702.10.9	0	0	29	6	8	0	0	0	406.581	76.1124	114.793	0	135.527	63.6351	2.12975	1.09069
FBgn0262870	NM_079917.6.2	14	0	0	12	63	38	290.561	0	0	152.225	903.994	411.821	96.8536	489.347	0.197924	-2.33698
FBgn0262872	NM_080765.3.2	6	9	44	41	20	62	124.526	114.001	616.882	520.101	286.982	671.918	285.136	493	0.578369	-0.789938
FBgn0262975	NM_001260330.3.3	527	480	663	172	297	139	10937.5	6080.06	9295.28	2181.89	4261.69	1506.4	8770.96	2649.99	3.30981	1.72675
FBgn0263258	NM_001298451.6.5	34	20	19	15	0	12	705.647	253.336	266.381	190.281	0	130.049	408.455	106.777	3.82532	1.93558
FBgn0263355	NM_001144371.2.2	41	0	17	0	0	0	850.928	0	238.341	0	0	0	363.089	0	Inf	#VALUE!
FBgn0263355	NM_001273695.2.2	0	15	0	118	108	50	0	190.002	0	1496.88	1549.7	541.869	63.3339	1196.15	0.0529482	-4.23928
FBgn0263390	NM_170043.2.2	0	0	0	14	10	0	0	0	0	177.596	143.491	0	0	107.029	0	#NUM!
FBgn0263395	NM_001299676.3.3	0	4	0	7	0	19	0	50.6672	0	88.7978	0	205.91	16.8891	98.236	0.171923	-2.54016
FBgn0263395	NM_001299676.7.4	0	0	0	8	14	22	0	0	0	101.483	200.888	238.422	0	180.264	0	#NUM!
FBgn0263490	NM_001260360.2.2	7	0	21	14	35	14	145.28	0	294.421	177.596	502.219	151.723	146.567	277.179	0.528781	-0.919259
FBgn0263705	NM_001272506.3.2	26	10	27	106	58	0	539.613	126.668	378.541	1344.65	832.249	0	348.274	725.634	0.479958	-1.05902
FBgn0263780	NM_001015352.10.9	3	0	0	5	31	25	62.263	0	0	63.427	444.823	270.935	20.7543	259.728	0.079908	-3.64552
FBgn0263934	NM_001273832.3.3	0	0	0	0	3	10	0	0	0	0	43.0474	108.374	0	50.4737	0	#NUM!
FBgn0263987	NM_001258603.4.2	0	0	0	1	15	0	0	0	0	12.6854	215.237	0	0	75.9741	0	#NUM!
FBgn0264090	NM_001272769.6.5	2	0	15	91	65	77	41.5087	0	210.301	1154.37	932.693	834.478	83.9364	973.847	0.0861905	-3.53633
FBgn0264273	NM_001274095.9.8	41	50	29	64	51	47	850.928	633.339	406.581	811.865	731.805	509.357	630.283	684.342	0.921005	-0.118719
FBgn0264273	NM_001274096.2.2	20	19	28	35	59	50	415.087	240.669	392.561	443.989	846.598	541.869	349.439	610.819	0.572083	-0.805704
FBgn0264273	NM_001274095.9.5	8	0	9	0	0	0	166.035	0	126.18	0	0	0	97.405	0	Inf	#VALUE!
FBgn0264273	NM_001144208.11.10	0	0	0	43	6	0	0	0	0	545.472	86.0947	0	0	210.522	0	#NUM!
FBgn0264357	NM_001170201.6.5	29	0	17	0	0	0	601.876	0	238.341	0	0	0	280.072	0	Inf	#VALUE!
FBgn0264357	NM_169947.6.4	16	0	19	0	0	0	332.069	0	266.381	0	0	0	199.483	0	Inf	#VALUE!
FBgn0264357	NM_080509.3.2	1	8	3	31	0	4	20.7543	101.334	42.0601	393.247	0	43.3495	54.7163	145.532	0.375973	-1.4113
FBgn0264494	NM_134774.3.2	75	61	99	110	57	59	1556.58	772.674	1387.98	1395.39	817.9	639.406	1239.08	950.9	1.30306	0.381902
FBgn0264494	NM_134774.5.2	20	8	42	22	0	20	415.087	101.334	588.841	279.079	0	216.748	368.421	165.275	2.22913	1.15648
FBgn0264494	NM_134774.8.2	0	0	0	10	0	18	0	0	0	126.854	0	195.073	0	107.309	0	#NUM!
FBgn0264785	NM_169037.5.2	26	16	0	10	2	0	539.613	202.669	0	126.854	28.6982	0	247.427	51.8507	4.77191	2.25457
FBgn0264894	NM_001103687.9.7	68	118	162	335	288	301	1411.29	1494.68	2271.25	4249.61	4132.55	3262.05	1725.74	3881.4	0.444618	-1.16936
FBgn0264959	NM_136347.7.6	13	3	54	50	42	53	269.806	38.0004	757.082	634.27	602.663	574.381	354.963	603.771	0.587909	-0.766334
FBgn0264959	NM_136347.2.2	11	0	4	71	80	108	228.298	0	56.0801	900.663	1147.93	1170.44	94.7926	1073.01	0.0883427	-3.50074
FBgn0265042	NM_001275932.2.2	0	0	0	27	18	0	0	0	0	342.506	258.284	0	0	200.263	0	#NUM!
FBgn0265082	NM_001043211.2.2	0	0	13	15	0	1	0	0	182.26	190.281	0	10.8374	60.7535	67.0394	0.906235	-0.142043
FBgn0265140	NM_001032403.7.3	46	24	13	1	14	16	954.7	304.003	182.26	12.6854	200.888	173.398	480.321	128.99	3.7237	1.89674
FBgn0265140	NM_001032403.7.5	2	0	25	0	0	0	41.5087	0	350.501	0	0	0	130.67	0	Inf	#VALUE!
FBgn0265191	NM_001299737.4.2	2051	2296	2765	3647	3281	3137	42567.1	29082.9	38765.4	46263.6	47079.5	33996.9	36805.2	42446.7	0.867092	-0.205743
FBgn0265191	NM_001299739.5.2	23	0	12	0	0	0	477.35	0	168.24	0	0	0	215.197	0	Inf	#VALUE!
FBgn0265194	NM_001144201.4.3	0	7	0	111	54	40	0	88.6675	0	1408.08	774.852	433.495	29.5558	872.142	0.0338888	-4.88305
FBgn0265356	NM_001144235.7.7	780	1083	1248	1879	2270	1810	16188.4	13718.1	17497	23835.9	32572.5	19615.7	15801.2	25341.3	0.623533	-0.681461
FBgn0265356	NM_137546.5.4	0	0	0	0	22	14	0	0	0	0	315.681	151.723	0	155.801	0	#NUM!
FBgn0265356	NM_001299669.6.2	0	0	0	15	10	0	0	0	0	190.281	143.491	0	0	111.257	0	#NUM!
FBgn0265416	NM_167371.10.5	1	2	9	7	0	0	20.7543	25.3336	126.18	88.7978	0	0	57.4227	29.5993	1.94001	0.956061
FBgn0265487	NM_001274115.9.6	25	0	6	0	4	22	518.858	0	84.1202	0	57.3965	238.422	200.993	98.6063	2.03834	1.02739
FBgn0265487	NM_001259462.6.5	0	0	0	27	8	15	0	0	0	342.506	114.793	162.561	0	206.62	0	#NUM!
FBgn0265523	NM_167335.3.3	24	45	12	43	89	21	498.104	570.006	168.24	545.472	1277.07	227.585	412.117	683.376	0.60306	-0.729627
FBgn0265595	NM_001298188.3.2	2	0	0	12	31	19	41.5087	0	0	152.225	444.823	205.91	13.8362	267.653	0.0516947	-4.27384
FBgn0265623	NM_001169663.5.2	0	6	11	0	0	0	0	76.0007	154.22	0	0	0	76.7404	0	Inf	#VALUE!
FBgn0265959	NM_080490.2.2	11	15	1	15	36	53	228.298	190.002	14.02	190.281	516.568	574.381	144.107	427.077	0.337425	-1.56736
FBgn0266019	NM_001258703.2.2	0	0	0	4	0	9	0	0	0	50.7416	0	97.5364	0	49.426	0	#NUM!
FBgn0266064	NM_169611.2.2	0	14	7	0	0	0	0	177.335	98.1402	0	0	0	91.8251	0	Inf	#VALUE!
FBgn0266377	NM_137970.4.3	350	380	488	406	422	510	7264.02	4813.38	6841.78	5150.27	6055.33	5527.07	6306.39	5577.55	1.13067	0.177182
FBgn0266377	NM_166616.4.2	0	0	0	35	0	43	0	0	0	443.989	0	466.007	0	303.332	0	#NUM!
FBgn0266410	NM_001031990.3.2	237	209	261	168	164	97	4918.78	2647.36	3659.23	2131.15	2353.26	1051.23	3741.79	1845.21	2.02784	1.01994
FBgn0266411	NM_001144657.6.2	165	231	178	118	126	123	3424.47	2926.03	2495.57	1496.88	1807.99	1333	2948.69	1545.95	1.90736	0.931575
FBgn0266411	NM_079845.10.9	0	30	5	41	47	63	0	380.004	70.1002	520.101	674.408	682.755	150.035	625.755	0.239766	-2.0603
FBgn0266580	NM_001273785.14.11	0	0	0	11	3	11	0	0	0	139.539	43.0474	119.211	0	100.599	0	#NUM!
FBgn0266696	NM_206244.3.2	25	121	99	115	161	129	518.858	1532.68	1387.98	1458.82	2310.21	1398.02	1146.51	1722.35	0.665665	-0.587132
FBgn0266696	NM_001299990.2.2	0	0	7	17	0	7	0	0	98.1402	215.652	0	75.8617	32.7134	97.1711	0.336658	-1.57065
FBgn0266758	NM_170653.5.3	2	7	19	0	23	0	41.5087	88.6675	266.381	0	330.03	0	132.186	110.01	1.20158	0.264932
FBgn0267033	NM_167387.3.3	0	10	0	7	11	18	0	126.668	0	88.7978	157.84	195.073	42.2226	147.237	0.286766	-1.80205
FBgn0267791	NM_001274173.6.2	35	26	34	47	99	14	726.402	329.337	476.681	596.214	1420.56	151.723	510.807	722.833	0.706673	-0.500886
FBgn0267795	NM_001274895.8.4	12	0	0	11	0	6	249.052	0	0	139.539	0	65.0243	83.0173	68.1879	1.21748	0.283897
FBgn0267978	NM_165445.4.2	0	1	0	23	5	25	0	12.6668	0	291.764	71.7456	270.935	4.22226	211.481	0.0199652	-5.64637
FBgn0283451	NM_001201596.8.8	0	8	3	0	0	2	0	101.334	42.0601	0	0	21.6748	47.7981	7.22492	6.61573	2.7259
FBgn0283499	NM_001144621.2.2	0	0	10	10	0	3	0	0	140.2	126.854	0	32.5121	46.7334	53.122	0.879737	-0.184855
FBgn0284231	NM_001347793.2.2	0	0	18	24	143	94	0	0	252.361	304.45	2051.92	1018.71	84.1202	1125.03	0.0747716	-3.74137
FBgn0284235	NM_001347800.3.2	22	23	0	0	0	0	456.595	291.336	0	0	0	0	249.311	0	Inf	#VALUE!
FBgn0284235	NM_001347798.3.2	0	0	22	34	17	39	0	0	308.441	431.304	243.935	422.658	102.814	365.965	0.280938	-1.83168
FBgn0284235	NM_001347798.8.4	0	0	0	0	23	6	0	0	0	0	330.03	65.0243	0	131.685	0	#NUM!
FBgn0284247	NM_001298622.6.5	12	0	7	0	0	0	249.052	0	98.1402	0	0	0	115.731	0	Inf	#VALUE!
FBgn0284257	NM_001103895.9.5	34	16	0	4	21	13	705.647	202.669	0	50.7416	301.331	140.886	302.772	164.32	1.84258	0.881727
FBgn0285948	NM_001201760.3.2	4	0	0	0	33	7	83.0173	0	0	0	473.521	75.8617	27.6724	183.128	0.15111	-2.72633
FBgn0285955	NM_001104316.4.4	17	43	25	16	12	39	352.824	544.672	350.501	202.966	172.189	422.658	415.999	265.938	1.56427	0.64549
FBgn0285955	NM_001104316.4.3	1	2	2	6	25	4	20.7543	25.3336	28.0401	76.1124	358.728	43.3495	24.7093	159.397	0.155018	-2.68949
FBgn0285955	NM_001104316.3.3	0	0	0	0	11	36	0	0	0	0	157.84	390.146	0	182.662	0	#NUM!
FBgn0285963	NM_001363936.2.2	119	150	189	150	123	218	2469.77	1900.02	2649.79	1902.81	1764.94	2362.55	2339.86	2010.1	1.16405	0.219153
FBgn0286071	NM_169659.8.4	22	0	8	0	0	0	456.595	0	112.16	0	0	0	189.585	0	Inf	#VALUE!
FBgn0286203	NM_001273780.2.2	3978	4772	4198	6287	5324	7505	82560.8	60445.9	58856.1	79753.1	76394.7	81334.6	67287.6	79160.8	0.850012	-0.234445
FBgn0286203	NM_165431.6.4	11	0	11	3	1	8	228.298	0	154.22	38.0562	14.3491	86.6991	127.506	46.3681	2.74986	1.45936
FBgn0286203	NM_165431.6.3	2	0	5	1	21	13	41.5087	0	70.1002	12.6854	301.331	140.886	37.2029	151.634	0.245347	-2.02711
FBgn0286203	NM_165432.3.3	0	1	3	1	16	0	0	12.6668	42.0601	12.6854	229.586	0	18.2423	80.7571	0.225891	-2.1463
FBgn0286511	NM_165471.3.2	97	129	0	122	106	89	2013.17	1634.02	0	1547.62	1521.01	964.527	1215.73	1344.38	0.904302	-0.145124

## Sheet: Sequencing_stats
short name	Sample	Genotype	Treatment	raw reads	U_Mapped	% mapped
Nxt1_R.rep1	Nxt1/Cani RNAseR.Rep1	Nxt1z2-0488 / Nxt1 DG05102	Ribozero, RNAseR	31722368	10196809	0.356
Nxt1_R.rep2	Nxt1/Cani RNAseR.Rep2	Nxt1z2-0488 / Nxt1 DG05102	Ribozero, RNAseR	35922613	12361076	0.3784
Nxt1_R.rep3	Nxt1/Cani RNAseR.Rep3	Nxt1z2-0488 / Nxt1 DG05102	Ribozero, RNAseR	35449535	12094823	0.38
WT_R.rep1	w1118 RNAseR.rep1	w1118	Ribozero, RNAseR	36281586	13702540	0.4022
WT_R.rep2	w1118 RNAseR.Rep2	w1118	Ribozero, RNAseR	33690448	14046269	0.4524
WT_R.rep3	w1118 RNAseR.Rep3	w1118	Ribozero, RNAseR	34606769	14605330	0.4594
Nxt1_M.rep1	Nxt1/Cani Mock.Rep1	Nxt1z2-0488 / Nxt1 DG05102	Ribozero only	49858776	19955449	0.4308
Nxt1_M.rep2	Nxt1/Cani Mock.Rep2	Nxt1z2-0488 / Nxt1 DG05102	Ribozero only	45652761	33309155	0.7813
Nxt1_M.rep3	Nxt1/Cani Mock.Rep3	Nxt1z2-0488 / Nxt1 DG05102	Ribozero only	46696336	33294809	0.7652
WT_M.rep1	w1118 Mock.Rep1	w1118	Ribozero only	43884677	32966819	0.8236
WT_M.rep2	w1118 Mock.Rep2	w1118	Ribozero only	43256401	32343237	0.814
WT_M.rep3	w1118 Mock.Rep3	w1118	Ribozero only	42272905	30697316	0.7846

## Sheet: # CircRNA Ided
		Nxt1			WT
		rep1	rep2	rep3	rep1	rep2	rep3
# CircRNA structures identfied	RNAseR treated	710	773	802	986	817	997
	Mock	82	140	141	236	199	195
# high confidence CircRNA (Identified in at least 2 replicates, supported by at least 10 backspliced reads )	RNAseR treated	404			523
	Mock	10			25
